# Supplementary material for: Comparison of matrix frequency-doubling technology perimetry and standard automated perimetry in monitoring the development of visual field defects for glaucoma suspect eyes
Source: PLoS One. 2017 May 18;12(5):e0178079. doi: 10.1371/journal.pone.0178079 (PMC5436878; doi:10.1371/journal.pone.0178079)
Supplement: S1 File — (CSV) [file pone.0178079.s001.csv]

Study_No	eye	age	SAP_MORE_CONSCRI	SAP_LESS_CONSCRI	FDT_MORE_CONSCRI	FDT_LESS_CONSCRI	SAP_MORE_CONSCRI_Time	SAP_LESS_CONSCRI_Time	FDT_MORE_CONSCRI_Time	FDT_LESS_CONSCRI_Time	RimArea	mRNFLthickness	Cup_DiskAreaRatio_0.1
1	OD	46.49	1	1	1	1	4.01	4.01	4.01	4.01	1.57	19	4.8
1	OS	46.49	1	1	1	1	4.01	4.01	4.01	4.01	1.46	21	4.5
2	OD	52.69	1	1	1	1	3.95	3.95	3.95	3.95	1.05	18	4.4
3	OS	65.9	1	1	1	1	4.01	4.01	4.01	4.01	1.66	37	3.2
4	OS	67.39	1	1	1	1	4.01	4.01	4.01	4.01	1.33	35	2.5
5	OD	60.05	1	1	1	1	3.87	3.87	3.87	3.87	1.24	27	1.9
6	OS	53.3	1	1	1	1	4.08	4.08	4.08	4.08	1.07	23	4.1
7	OD	43.44	1	1	1	1	4.00	4.00	4.00	4.00	0.93	21	3.6
8	OD	50.43	1	1	1	1	3.86	3.86	3.86	3.86	1.41	17	3.5
9	OS	53.59	1	1	1	1	3.91	3.91	3.91	3.91	1.33	31	2.1
10	OD	65.31	1	1	1	0	3.79	3.79	3.79	3.79	1.09	22	2.7
10	OS	65.31	1	1	1	1	3.79	3.79	3.79	3.79	0.84	17	4.5
11	OD	45.64	1	1	1	1	4.23	4.23	4.23	4.23	1.14	17	5.5
11	OS	45.64	1	1	1	1	4.14	4.14	4.14	4.14	0.81	25	5.7
12	OD	32.84	1	1	1	1	3.85	3.85	3.85	3.85	1.17	30	2.9
12	OS	32.78	1	1	1	1	3.92	3.92	3.92	3.92	1.33	24	2
13	OD	51.43	1	1	1	1	4.09	4.09	4.09	4.09	1.1	19	3.2
13	OS	51.45	1	1	1	1	4.07	4.07	4.07	4.07	1.06	22	3.3
14	OD	56.33	1	1	1	1	3.96	3.96	3.96	3.96	1.43	19	4
15	OD	36.01	1	1	1	1	3.95	3.95	3.95	3.95	1.55	20	5.8
15	OS	36.01	1	1	1	1	3.95	3.95	3.95	3.95	1.71	25	5.7
16	OD	49.85	1	1	1	1	4.10	4.10	4.10	4.10	1.22	27	3.3
16	OS	49.96	1	1	1	1	3.99	3.99	3.99	3.99	1.16	32	3.3
17	OD	42.43	1	1	1	1	3.92	3.92	3.92	3.92	1.35	23	4.7
18	OD	51.81	1	1	1	1	3.90	3.90	3.90	3.90	1.21	21	4.9
18	OS	51.81	1	1	1	1	3.90	3.90	3.90	3.90	1.19	23	5.5
19	OD	63.31	1	1	1	1	3.85	3.85	3.85	3.85	1.91	19	1.3
19	OS	63.31	1	1	1	1	3.85	3.85	3.85	3.85	1.78	24	2.4
20	OD	61.35	1	1	1	1	3.95	3.95	3.95	3.95	1.29	27	2.3
20	OS	61.43	1	1	1	1	3.87	3.87	3.87	3.87	1.14	19	2.7
21	OD	66.42	1	1	1	1	3.97	3.97	3.97	3.97	1.4	22	2.7
21	OS	66.42	1	1	1	1	3.93	3.93	3.93	3.93	1.24	22	3.8
22	OD	66.38	1	1	1	1	3.83	3.83	3.83	3.83	1.44	19	5.5
23	OS	48.47	1	1	1	1	3.97	3.97	3.97	3.97	1.4	22	3.6
24	OD	56.35	1	1	1	1	3.98	3.98	3.98	3.98	1.37	25	3.5
25	OD	66.28	1	1	1	1	3.82	3.82	3.82	3.82	1.36	16	4.5
26	OS	68.1	1	1	1	1	3.93	3.93	3.93	3.93	1.07	16	4.3
27	OS	53.66	1	1	1	1	4.02	4.02	4.02	4.02	1.44	24	4.8
28	OS	70.64	1	1	1	1	3.93	3.93	3.93	3.93	1.3	9	4.9
29	OD	51.82	1	1	1	1	3.88	3.88	3.88	3.88	1.72	25	5.7
29	OS	51.82	1	1	1	0	3.88	3.88	3.88	3.88	1.55	24	4.4
30	OS	64.84	1	1	1	1	3.96	3.96	3.96	3.96	1.32	21	3.4
31	OS	57.48	1	1	1	1	3.87	3.87	3.87	3.87	1.75	23	3.6
32	OS	47.97	1	1	1	1	3.97	3.97	3.97	3.97	1.33	32	0.9
33	OD	56.09	1	1	1	1	2.97	2.97	2.97	2.97	1.03	9	5.8
34	OD	50.61	1	1	1	1	5.00	5.00	5.00	5.00	1.17	19	3.8
34	OS	50.61	1	1	1	1	5.00	5.00	5.00	5.00	1.14	20	3.6
35	OD	51.97	1	1	1	1	5.04	5.04	5.04	5.04	1.31	20	2.8
36	OD	44.98	1	1	1	1	5.02	5.02	5.02	5.02	1.07	22	4.5
36	OS	44.98	1	1	1	1	5.02	5.02	5.02	5.02	1.34	24	4.1
37	OS	52.31	1	1	1	1	4.90	4.90	4.90	4.90	1.05	17	5.4
38	OD	55.93	1	1	1	1	4.08	4.08	4.08	4.08	1.76	26	3.7
38	OS	55.93	1	1	1	1	4.08	4.08	4.08	4.08	2.22	37	2.4
39	OD	48.7	1	0	1	1	3.96	3.97	3.96	3.96	0.76	7	7.3
40	OD	55.56	1	1	1	1	3.83	3.83	3.83	3.83	1.25	25	4.2
40	OS	55.48	1	1	1	1	3.91	3.91	3.91	3.91	1.2	21	4.7
41	OS	61.95	0	0	1	0	2.87	1.88	4.08	2.84	1.03	14	4.9
42	OD	44.73	1	1	1	1	3.98	3.98	3.98	3.98	0.86	22	6.6
42	OS	44.73	1	1	1	1	3.98	3.98	3.98	3.98	0.9	21	6.5
43	OD	70.48	0	0	0	0	2.91	2.91	2.05	2.05	0.85	21	4.7
44	OD	55.62	1	1	1	1	3.88	3.88	3.88	3.88	0.89	16	5.1
45	OD	57.01	1	1	1	1	3.94	3.94	3.94	3.94	1.45	23	1.3
45	OS	57.01	1	1	1	1	3.94	3.94	3.94	3.94	1.35	21	1.8
46	OS	61.58	1	1	1	1	4.21	4.21	4.21	4.21	1.35	18	3.6
47	OD	62.3	1	1	1	1	3.82	3.82	3.82	3.82	1.53	21	2
47	OS	62.3	1	1	1	1	3.82	3.82	3.82	3.82	1.53	21	1.5
48	OS	66.16	1	1	1	1	3.99	3.99	3.99	3.99	0.93	19	5
49	OD	59.44	1	1	1	0	3.88	3.88	3.88	3.88	1.21	36	2
49	OS	59.44	1	1	1	1	3.88	3.88	3.88	3.88	1.41	29	1.9
50	OD	51.96	1	1	1	1	3.97	3.97	3.97	3.97	1.53	25	4.8
50	OS	51.96	1	1	1	1	3.97	3.97	3.97	3.97	1.66	20	4.7
51	OD	60.57	1	1	1	1	4.14	4.14	4.14	4.14	1.38	18	3.9
52	OS	46.03	1	1	1	1	4.04	4.04	4.04	4.04	1.78	25	2.2
53	OS	60.92	1	1	1	0	3.96	3.96	3.96	3.96	0.76	7	6.9
54	OD	53.3	1	1	1	1	4.10	4.10	4.10	4.10	1.16	16	1.3
55	OD	54.93	1	1	1	1	4.04	4.04	4.04	4.04	0.97	13	5.6
55	OS	54.93	1	1	1	1	4.04	4.04	4.04	4.04	0.9	12	6.1
56	OS	69.12	0	0	0	0	3.01	3.01	3.88	3.01	2.16	28	1.4
57	OS	54.51	1	1	1	1	3.98	3.98	3.98	3.98	1.48	32	2.8
58	OD	60.24	1	1	1	1	3.96	3.96	3.96	3.96	1.88	26	3
58	OS	60.22	1	1	1	1	3.98	3.98	3.98	3.98	1.78	21	3
59	OD	66.05	1	1	1	1	4.00	4.00	4.00	4.00	1.1	17	5.7
60	OD	66.83	1	1	1	1	2.56	2.56	2.56	2.56	1.72	19	3
60	OS	66.83	1	1	1	1	2.56	2.56	2.56	2.56	1.5	19	3.1
61	OD	61.69	1	1	1	1	4.83	4.83	4.83	4.83	0.99	29	5.9
62	OD	54.87	1	1	1	1	8.37	8.37	8.37	8.37	1.44	17	3.4
62	OS	58.73	1	1	1	1	4.08	4.08	4.08	4.08	1.22	21	4.4
63	OD	63.69	1	1	1	1	5.55	5.55	5.55	5.55	1.25	28	3.1
64	OS	56.32	1	1	1	1	7.92	7.92	7.92	7.92	1.08	25	5.4
65	OS	67.46	1	1	1	1	5.84	5.84	5.84	5.84	1.28	13	4.8
66	OS	51.07	1	1	1	1	3.05	3.05	3.05	3.05	1.67	30	0.3
67	OD	58.5	1	1	1	1	5.70	5.70	5.70	5.70	1.73	30	1.3
68	OD	66.04	1	1	1	1	5.28	5.28	5.28	5.28	1.08	27	1.9
68	OS	66.04	1	1	1	1	5.28	5.28	5.28	5.28	1.14	26	3.1
69	OD	65.18	1	1	1	1	3.62	3.62	3.62	3.62	1.02	7	4.4
70	OD	60.3	1	1	1	1	8.85	8.85	8.85	8.85	1.26	18	4.4
70	OS	60.3	1	1	1	1	8.85	8.85	8.85	8.85	1.45	25	2.5
71	OD	65.91	1	1	1	1	4.73	4.73	4.73	4.73	1.32	21	4.4
72	OD	64.44	1	1	1	1	3.75	3.75	3.75	3.75	0.89	15	6.6
72	OS	63.31	1	1	1	1	4.88	4.88	4.88	4.88	1.16	21	5.6
73	OD	59.75	1	1	1	1	4.12	4.12	4.12	4.12	1.51	33	1.6
74	OS	58.81	0	0	0	0	4.77	4.26	2.86	2.86	1.25	14	2.8
75	OS	63.93	1	1	1	1	2.41	2.41	2.41	2.41	1.21	29	0.6
76	OD	68.28	1	1	1	1	5.72	5.72	5.72	5.72	1.45	25	3.5
77	OD	67.62	1	1	0	0	7.07	7.07	6.51	6.51	1.12	24	3.9
78	OD	51.66	1	1	1	1	8.50	8.50	8.50	8.50	1.92	22	1.4
78	OS	51.66	1	1	1	1	8.50	8.50	8.50	8.50	1.73	17	2.7
79	OS	67.36	1	1	1	1	5.07	5.07	5.07	5.07	1.43	20	1.1
80	OD	46.61	1	1	1	1	3.75	3.75	3.75	3.75	1.26	30	2.8
80	OS	46.61	1	1	1	1	3.75	3.75	3.75	3.75	1.48	27	2.3
81	OS	64.87	1	1	1	1	9.00	9.00	9.00	9.00	1.29	34	3.1
82	OD	40.6	1	1	1	1	4.69	4.69	4.69	4.69	1.83	30	2.2
83	OD	65.08	1	1	1	1	7.64	7.64	7.64	7.64	1.36	26	1.7
84	OD	54.7	1	1	1	1	5.38	5.38	5.38	5.38	1.06	19	5
84	OS	54.7	1	1	1	1	5.38	5.38	5.38	5.38	1.34	28	3.8
85	OD	51.88	1	1	1	1	8.05	8.05	8.05	8.05	1.09	17	4.2
85	OS	51.88	1	1	1	1	8.05	8.05	8.05	8.05	1.02	23	3.9
86	OD	60.96	1	1	0	0	5.94	5.94	3.87	2.75	1.44	21	0
87	OS	61.7	1	1	0	0	6.10	6.10	6.10	6.10	1.39	36	2.8
88	OS	68.23	1	1	1	1	1.63	1.63	1.63	1.63	0.98	27	2.2
89	OD	52.5	1	1	1	1	4.83	4.83	4.83	4.83	1.27	30	3.2
89	OS	53.2	1	1	1	1	4.15	4.15	4.15	4.15	1.24	28	2.3
90	OD	65.62	1	1	1	1	4.20	4.20	4.20	4.20	1.12	22	4.8
90	OS	64.63	1	1	1	1	5.19	5.19	5.19	5.19	1.16	32	4.2
91	OD	60.12	1	1	1	1	4.17	4.17	4.17	4.17	0.96	47	2.6
92	OD	54.56	1	1	1	1	4.20	4.20	4.20	4.20	1.43	26	1.6
93	OD	50.03	1	1	1	1	9.02	9.02	9.02	9.02	1.36	24	2.5
93	OS	50.03	1	1	1	1	9.02	9.02	9.02	9.02	1.45	24	2.2
94	OD	60.36	1	1	1	1	6.62	6.62	6.62	6.62	1.47	21	4.9
94	OS	61.35	1	1	1	1	5.64	5.64	5.64	5.64	1.3	18	4.6
95	OD	62.51	1	1	1	1	3.82	3.82	3.82	3.82	1.6	15	2.9
96	OS	66.22	0	0	0	0	3.33	3.33	4.03	4.03	1.36	22	2.3
97	OS	65.03	1	1	1	1	9.12	9.12	9.12	9.12	1.79	20	4.8
98	OD	52.09	1	1	1	1	5.59	5.59	5.59	5.59	1.35	22	4.5
98	OS	52.09	1	1	1	1	5.59	5.59	5.59	5.59	1.37	34	3.2
99	OD	43.9	1	1	1	1	9.81	9.81	9.81	9.81	1.37	28	3.7
99	OS	44.88	1	1	1	1	8.84	8.84	8.84	8.84	1.35	28	4.3
100	OD	68.62	0	0	0	0	6.05	6.05	3.60	3.60	1.12	25	4.9
100	OS	68.67	0	0	0	0	4.73	4.73	3.60	3.60	1.59	24	4
101	OD	43.59	1	1	1	1	8.87	8.87	8.87	8.87	1.75	35	0
101	OS	43.51	1	1	1	1	8.95	8.95	8.95	8.95	1.69	31	0
102	OD	53.87	1	1	1	1	4.81	4.81	4.81	4.81	1.23	12	3.7
102	OS	53.83	1	1	1	0	4.85	4.85	4.85	4.85	0.95	21	3.2
103	OS	49.02	1	1	1	1	5.59	5.59	5.59	5.59	1.39	28	5.6
104	OD	68.54	1	1	1	1	3.93	3.93	3.93	3.93	1.29	22	3.6
105	OS	67.67	1	1	1	1	3.32	3.32	3.32	3.32	1.15	19	5.4
106	OD	38.98	1	1	1	1	3.85	3.85	3.85	3.85	1.73	18	4.9
107	OD	61.44	1	1	1	1	8.89	8.89	8.89	8.89	1.82	23	3.1
108	OS	49.43	1	1	1	1	5.77	5.77	5.77	5.77	1.41	24	0.5
109	OD	62.31	1	1	1	1	6.12	6.12	6.12	6.12	1.47	28	2.2
109	OS	61.72	1	1	1	1	6.72	6.72	6.72	6.72	1.65	22	1.9
110	OD	57.44	1	1	1	1	3.92	3.92	3.92	3.92	0.85	21	5.8
110	OS	57.44	1	1	1	1	3.92	3.92	3.92	3.92	1.41	27	4.9
111	OD	47.99	1	1	1	1	3.95	3.95	3.95	3.95	1.51	30	2.4
111	OS	46.96	1	1	1	1	4.98	4.98	4.98	4.98	1.02	38	2.3
112	OD	67.62	1	1	1	1	9.62	9.62	9.62	9.62	1.07	24	4.4
112	OS	67.62	1	1	1	1	9.62	9.62	9.62	9.62	1.59	26	2.6
113	OS	44.64	1	1	1	1	7.54	7.54	7.54	7.54	1.12	31	5
114	OD	64.38	1	1	1	1	9.05	9.05	9.05	9.05	1.31	25	2.8
114	OS	64.42	1	1	1	1	9.01	9.01	9.01	9.01	1.34	34	2.5
115	OD	69.84	1	1	1	0	7.25	7.25	7.25	7.25	1.44	38	3.1
116	OD	37.81	1	1	1	1	3.79	3.79	3.79	3.79	1.29	25	3.2
116	OS	37.81	1	1	1	1	3.79	3.79	3.79	3.79	1.39	26	2.2
117	OD	68.2	1	1	1	1	8.71	8.71	8.71	8.71	1.63	34	1.8
117	OS	68.2	1	1	1	1	8.71	8.71	8.71	8.71	1.5	34	2.2
118	OD	68.09	1	1	1	1	4.96	4.96	4.96	4.96	1.84	32	0.1
118	OS	68.09	1	1	1	1	4.96	4.96	4.96	4.96	1.7	23	0
119	OD	45.84	1	1	1	1	9.52	9.52	9.52	9.52	1.68	30	1.8
119	OS	45.84	1	1	1	1	9.52	9.52	9.52	9.52	1.84	25	2.5
120	OS	40.1	0	0	1	1	5.12	5.12	6.24	6.24	1.07	25	4.2
121	OD	50.49	1	1	1	1	6.83	6.83	6.83	6.83	1.28	31	5.5
121	OS	50.48	1	1	1	1	6.84	6.84	6.84	6.84	1.55	38	5.4
122	OD	69.95	0	0	1	1	4.56	4.56	7.67	7.67	1.54	23	4.6
122	OS	69.88	1	1	1	1	7.74	7.74	7.74	7.74	1.44	19	4.8
123	OD	45.35	1	1	1	1	8.56	8.56	8.56	8.56	2.11	35	2.3
123	OS	45.35	1	1	1	1	8.56	8.56	8.56	8.56	2.03	28	0.9
124	OS	51.63	1	1	1	1	8.99	8.99	8.99	8.99	1.24	18	1.9
125	OD	57.2	1	1	1	1	6.58	6.58	6.58	6.58	1.24	30	2.5
125	OS	57.2	1	1	1	1	6.58	6.58	6.58	6.58	0.99	26	3.7
126	OD	59.74	1	1	1	1	7.87	7.87	7.87	7.87	1.18	29	4
127	OS	58.21	1	1	1	1	4.99	4.99	4.99	4.99	1.1	18	3.5
128	OS	48.45	1	1	1	1	5.00	5.00	5.00	5.00	1.16	27	3.6
129	OD	65.21	1	1	1	1	2.91	2.91	2.91	2.91	1.28	18	3.6
130	OS	66.57	1	1	1	1	6.73	6.73	6.73	6.73	1.1	27	4.8
131	OS	69.62	1	1	1	1	4.99	4.99	4.99	4.99	1.34	33	4.6
132	OD	32.33	1	1	1	1	5.45	5.45	5.45	5.45	1.15	25	4.5
132	OS	32.27	1	1	1	1	5.50	5.50	5.50	5.50	1.19	29	3.7
133	OD	61.71	1	1	1	0	6.09	6.09	6.09	2.84	1.51	27	3.8
133	OS	61.78	0	0	0	0	3.90	2.75	1.68	1.68	1.37	21	4.4
134	OS	53.49	1	1	1	1	3.95	3.95	3.95	3.95	1.64	22	2.7
135	OD	64.88	1	1	1	1	3.98	3.98	3.98	3.98	1.06	15	2.7
135	OS	64.88	1	1	1	1	3.98	3.98	3.98	3.98	1.32	33	2.4
136	OS	67.41	1	1	1	1	4.12	4.12	4.12	4.12	1.72	14	4.1
137	OD	67.21	1	1	1	1	6.23	6.23	6.23	6.23	1.2	26	3.4
137	OS	67.21	1	1	1	1	6.23	6.23	6.23	6.23	1.06	17	4.9
138	OD	68.62	1	1	1	1	4.04	4.04	4.04	4.04	1.34	29	2.1
138	OS	68.62	1	1	1	1	4.04	4.04	4.04	4.04	1.38	33	1.1
139	OD	66.87	1	1	1	1	5.11	5.11	5.11	5.11	1.38	26	2.4
139	OS	66.87	1	1	1	1	5.11	5.11	5.11	5.11	1.3	22	1.5
140	OD	57.5	1	1	1	1	5.26	5.26	5.26	5.26	1.45	31	2
141	OD	61.22	1	1	0	0	5.90	5.90	5.58	5.58	1.02	22	5.8
142	OS	54.35	1	1	1	1	3.74	3.74	3.74	3.74	1.16	22	4.1
143	OD	57.56	1	1	1	1	4.70	4.70	4.70	4.70	1.22	21	2.8
143	OS	57.56	1	1	1	1	4.70	4.70	4.70	4.70	1.21	21	3.4
144	OD	59.4	1	1	1	1	4.83	4.83	4.83	4.83	1.25	31	2.2
145	OD	54.02	1	1	1	1	3.60	3.60	3.60	3.60	1.12	19	5.3
145	OS	54.02	1	1	1	1	3.60	3.60	3.60	3.60	1.36	24	5.2
146	OD	56.49	1	1	1	1	4.63	4.63	4.63	4.63	1.75	23	1.1
146	OS	56.49	1	1	1	1	3.84	3.84	3.84	3.84	1.57	23	1.6
147	OD	59.67	1	1	1	1	4.97	4.97	4.97	4.97	1.44	24	3
147	OS	59.67	1	1	1	1	4.97	4.97	4.97	4.97	1.48	30	2.6
148	OS	68.75	1	1	0	0	4.96	4.96	2.43	2.43	1.17	23	3.2
149	OD	55.67	1	1	1	1	3.85	3.85	3.85	3.85	1.1	31	2.8
149	OS	55.67	1	1	1	1	3.85	3.85	3.85	3.85	1.21	26	3.6
150	OS	67.34	1	1	1	1	5.32	5.32	5.32	5.32	1.38	19	0.7
151	OD	68.52	1	1	1	1	5.11	5.11	5.11	5.11	1.14	20	3.5
151	OS	68.52	1	1	1	1	5.11	5.11	5.11	5.11	1.21	23	2.3
152	OD	55.16	1	1	1	1	6.29	6.29	6.29	6.29	0.89	20	5.8
153	OD	51.66	1	1	1	1	4.21	4.21	4.21	4.21	1.48	25	3.3
154	OS	66.09	1	1	0	0	3.44	3.44	3.21	3.21	0.78	16	6.8
155	OS	70.55	1	1	1	1	2.78	2.78	2.78	2.78	1.35	23	3.4
