# Supplementary material for: Comparison of matrix frequency-doubling technology perimetry and standard automated perimetry in monitoring the development of visual field defects for glaucoma suspect eyes
Source: PLoS One. 2017 May 18;12(5):e0178079. doi: 10.1371/journal.pone.0178079 (PMC5436878; doi:10.1371/journal.pone.0178079)
Supplement: S2 File — (CSV) [file pone.0178079.s002.csv]

Study_No	eye	age	MD	PSD	TestType	time
1	OD	46.49	-0.02	0.109	sap	0
1	OD	47.34	-0.064	0.129	sap	0.85
1	OD	48.41	0.086	0.148	sap	1.91
1	OD	49.36	0.156	0.144	sap	2.86
1	OD	50.51	-0.097	0.162	sap	4.01
1	OS	46.49	-0.097	0.149	sap	0
1	OS	47.34	-0.05	0.139	sap	0.85
1	OS	48.41	0.076	0.147	sap	1.91
1	OS	49.36	0.137	0.188	sap	2.86
1	OS	50.51	-0.04	0.166	sap	4.01
2	OD	52.69	-0.009	0.154	sap	0
2	OD	53.52	-0.207	0.186	sap	0.83
2	OD	54.67	-0.054	0.182	sap	1.98
2	OD	55.61	-0.06	0.189	sap	2.92
2	OD	56.64	-0.043	0.173	sap	3.95
3	OS	65.9	-0.009	0.159	sap	0
3	OS	66.94	0.009	0.142	sap	1.04
3	OS	67.82	0.079	0.113	sap	1.92
3	OS	68.86	0.05	0.159	sap	2.96
3	OS	69.91	-0.004	0.154	sap	4.01
4	OS	67.39	0.137	0.131	sap	0
4	OS	68.35	0.286	0.134	sap	0.96
4	OS	69.27	0.205	0.158	sap	1.88
4	OS	70.35	0.029	0.13	sap	2.96
4	OS	71.4	0.119	0.154	sap	4.01
5	OD	60.05	0.098	0.141	sap	0
5	OD	60.95	-0.035	0.241	sap	0.9
5	OD	61.88	0.02	0.179	sap	1.82
5	OD	62.97	0.056	0.191	sap	2.92
5	OD	63.93	0.081	0.185	sap	3.87
6	OS	53.3	0.158	0.095	sap	0
6	OS	54.42	0.04	0.167	sap	1.12
6	OS	55.35	0.163	0.111	sap	2.05
6	OS	56.27	0.211	0.132	sap	2.97
6	OS	57.38	0.096	0.17	sap	4.08
7	OD	43.44	-0.093	0.18	sap	0
7	OD	44.33	-0.104	0.215	sap	0.89
7	OD	45.39	-0.061	0.172	sap	1.95
7	OD	46.39	-0.043	0.167	sap	2.95
7	OD	47.44	-0.032	0.135	sap	4
8	OD	50.43	0.118	0.139	sap	0
8	OD	51.21	0.05	0.141	sap	0.78
8	OD	52.24	0.142	0.138	sap	1.81
8	OD	53.35	0.07	0.156	sap	2.92
8	OD	54.29	0.141	0.119	sap	3.86
9	OS	53.59	0.123	0.14	sap	0
9	OS	54.5	0.066	0.109	sap	0.91
9	OS	55.38	0.026	0.145	sap	1.79
9	OS	56.36	-0.045	0.144	sap	2.77
9	OS	57.5	0.012	0.128	sap	3.91
10	OD	65.31	0.147	0.181	sap	0
10	OD	66.05	0.093	0.191	sap	0.74
10	OD	67.04	0.028	0.153	sap	1.73
10	OD	68.15	-0.142	0.597	sap	2.84
10	OD	69.1	-0.079	0.364	sap	3.79
10	OS	65.31	0.031	0.178	sap	0
10	OS	66.05	0.052	0.171	sap	0.74
10	OS	67.04	-0.073	0.272	sap	1.73
10	OS	68.15	-0.038	0.152	sap	2.84
10	OS	69.1	0.001	0.144	sap	3.79
11	OD	45.6	0.232	0.1	sap	0
11	OD	46.74	0.226	0.124	sap	1.13
11	OD	47.64	0.307	0.154	sap	2.03
11	OD	48.66	0.284	0.116	sap	3.05
11	OD	49.88	0.241	0.118	sap	4.27
11	OS	45.6	0.23	0.111	sap	0
11	OS	46.74	0.237	0.102	sap	1.13
11	OS	47.64	0.276	0.114	sap	2.03
11	OS	48.66	0.275	0.089	sap	3.05
11	OS	49.79	0.211	0.126	sap	4.18
12	OD	32.91	-0.098	0.144	sap	0
12	OD	33.79	-0.142	0.143	sap	0.87
12	OD	34.86	-0.05	0.114	sap	1.94
12	OD	35.82	-0.173	0.116	sap	2.9
12	OD	36.7	-0.323	0.22	sap	3.79
12	OS	32.78	-0.072	0.135	sap	0
12	OS	33.79	-0.074	0.149	sap	1
12	OS	34.86	0.099	0.132	sap	2.07
12	OS	35.82	-0.058	0.126	sap	3.03
12	OS	36.7	-0.362	0.193	sap	3.92
13	OD	51.43	0.123	0.145	sap	0
13	OD	52.36	0.141	0.179	sap	0.93
13	OD	53.52	0.129	0.139	sap	2.08
13	OD	54.47	0.168	0.156	sap	3.04
13	OD	55.53	0.129	0.15	sap	4.09
13	OS	51.43	0.188	0.13	sap	0
13	OS	52.36	0.158	0.158	sap	0.93
13	OS	53.52	0.104	0.126	sap	2.08
13	OS	54.47	0.084	0.142	sap	3.04
13	OS	55.53	0.127	0.132	sap	4.09
14	OD	56.33	0.065	0.171	sap	0
14	OD	57.43	0.135	0.136	sap	1.09
14	OD	58.35	-0.086	0.182	sap	2.02
14	OD	59.53	0.093	0.125	sap	3.2
14	OD	60.29	-0.095	0.193	sap	3.96
15	OD	35.99	0.099	0.132	sap	0
15	OD	37.08	0.205	0.196	sap	1.08
15	OD	37.93	0.09	0.135	sap	1.93
15	OD	38.96	0.164	0.142	sap	2.96
15	OD	39.96	0.223	0.148	sap	3.96
15	OS	36.01	0.052	0.15	sap	0
15	OS	37.08	0.138	0.123	sap	1.07
15	OS	37.93	0.157	0.12	sap	1.92
15	OS	38.96	0.236	0.177	sap	2.95
15	OS	39.96	0.127	0.106	sap	3.95
16	OD	49.85	0.234	0.149	sap	0
16	OD	50.87	0.256	0.131	sap	1.01
16	OD	51.77	0.2	0.09	sap	1.92
16	OD	52.77	0.237	0.13	sap	2.92
16	OD	53.96	0.183	0.116	sap	4.1
16	OS	49.96	0.215	0.122	sap	0
16	OS	50.9	0.275	0.12	sap	0.94
16	OS	51.77	0.209	0.109	sap	1.81
16	OS	52.77	0.256	0.098	sap	2.81
16	OS	54.03	0.266	0.115	sap	4.07
17	OD	42.43	-0.157	0.307	sap	0
17	OD	43.44	-0.082	0.273	sap	1.01
17	OD	44.58	-0.31	0.218	sap	2.15
17	OD	45.4	-0.098	0.164	sap	2.97
17	OD	46.35	-0.286	0.4	sap	3.92
18	OD	51.85	-0.074	0.132	sap	0
18	OD	52.77	-0.013	0.128	sap	0.92
18	OD	53.71	-0.022	0.161	sap	1.86
18	OD	54.8	0.121	0.124	sap	2.95
18	OD	55.7	-0.07	0.142	sap	3.85
18	OS	51.85	-0.036	0.173	sap	0
18	OS	52.77	0.01	0.167	sap	0.92
18	OS	53.71	0.031	0.126	sap	1.86
18	OS	54.8	0.111	0.129	sap	2.95
18	OS	55.7	0.122	0.182	sap	3.85
19	OD	63.31	0.122	0.115	sap	0
19	OD	64.3	-0.059	0.174	sap	0.99
19	OD	65.15	0.021	0.124	sap	1.84
19	OD	66.14	-0.029	0.179	sap	2.83
19	OD	67.16	-0.064	0.146	sap	3.85
19	OS	63.31	0.018	0.123	sap	0
19	OS	64.3	-0.1	0.178	sap	0.99
19	OS	65.15	0.065	0.141	sap	1.84
19	OS	66.14	0.018	0.145	sap	2.83
19	OS	67.16	0.06	0.152	sap	3.85
20	OD	61.43	-0.036	0.133	sap	0
20	OD	62.39	-0.184	0.153	sap	0.96
20	OD	63.28	-0.171	0.163	sap	1.85
20	OD	64.3	-0.151	0.152	sap	2.87
20	OD	65.3	-0.189	0.179	sap	3.87
20	OS	61.43	-0.046	0.184	sap	0
20	OS	62.39	-0.242	0.257	sap	0.96
20	OS	63.28	-0.197	0.188	sap	1.85
20	OS	64.34	-0.14	0.16	sap	2.91
20	OS	65.3	-0.399	0.135	sap	3.87
21	OD	66.34	0.073	0.158	sap	0
21	OD	67.37	0.112	0.193	sap	1.02
21	OD	68.33	0.213	0.14	sap	1.98
21	OD	69.3	-0.065	0.18	sap	2.96
21	OD	70.4	0.143	0.179	sap	4.05
21	OS	66.34	0.11	0.154	sap	0
21	OS	67.37	0.056	0.171	sap	1.02
21	OS	68.33	-0.024	0.199	sap	1.98
21	OS	69.3	-0.153	0.205	sap	2.96
21	OS	70.4	0.123	0.158	sap	4.05
22	OD	66.38	-0.118	0.149	sap	0
22	OD	67.28	-0.122	0.181	sap	0.9
22	OD	68.18	-0.158	0.157	sap	1.8
22	OD	69.18	-0.178	0.2	sap	2.8
22	OD	70.21	-0.52	0.348	sap	3.83
23	OS	48.47	-0.154	0.198	sap	0
23	OS	49.44	-0.094	0.131	sap	0.97
23	OS	50.35	-0.02	0.136	sap	1.88
23	OS	51.4	-0.169	0.183	sap	2.93
23	OS	52.44	-0.098	0.167	sap	3.97
24	OD	56.35	-0.009	0.119	sap	0
24	OD	57.24	-0.105	0.175	sap	0.88
24	OD	58.56	0.03	0.132	sap	2.22
24	OD	59.54	-0.009	0.164	sap	3.2
24	OD	60.33	0.046	0.177	sap	3.98
25	OD	66.28	0.156	0.14	sap	0
25	OD	67.1	0.153	0.151	sap	0.8
25	OD	68.1	0.045	0.145	sap	1.8
25	OD	69.08	0.064	0.159	sap	2.79
25	OD	70.12	0.12	0.166	sap	3.82
26	OS	68.1	-0.114	0.138	sap	0
26	OS	69.01	-0.053	0.145	sap	0.9
26	OS	70.02	-0.154	0.129	sap	1.92
26	OS	71.17	-0.029	0.153	sap	3.08
26	OS	72.03	-0.012	0.132	sap	3.93
27	OS	53.66	0.189	0.158	sap	0
27	OS	54.73	0.045	0.225	sap	1.07
27	OS	55.69	0.131	0.202	sap	2.02
27	OS	56.59	-0.148	0.299	sap	2.93
27	OS	57.68	-0.184	0.319	sap	4.02
28	OS	70.6	0.007	0.14	sap	0
28	OS	71.62	0.084	0.162	sap	1.02
28	OS	72.61	0.041	0.175	sap	2.01
28	OS	73.53	-0.121	0.433	sap	2.93
28	OS	74.56	0.001	0.173	sap	3.96
29	OD	51.79	0.178	0.163	sap	0
29	OD	52.23	0.066	0.15	sap	0.44
29	OD	52.71	0.107	0.125	sap	0.91
29	OD	53.78	0.041	0.276	sap	1.99
29	OD	54.86	0.194	0.171	sap	3.07
29	OD	55.72	0.196	0.136	sap	3.92
29	OS	51.79	0.183	0.141	sap	0
29	OS	52.23	0.143	0.151	sap	0.44
29	OS	52.71	0.126	0.126	sap	0.91
29	OS	53.78	0.168	0.133	sap	1.99
29	OS	54.86	0.18	0.149	sap	3.07
29	OS	55.72	0.208	0.13	sap	3.92
30	OS	64.84	0.29	0.135	sap	0
30	OS	65.79	0.206	0.133	sap	0.95
30	OS	66.82	0.333	0.122	sap	1.98
30	OS	67.82	0.285	0.124	sap	2.98
30	OS	68.8	0.254	0.19	sap	3.96
31	OS	57.48	0.202	0.142	sap	0
31	OS	58.35	0.155	0.178	sap	0.87
31	OS	59.37	0.065	0.198	sap	1.89
31	OS	60.43	0.221	0.11	sap	2.95
31	OS	61.36	0.279	0.234	sap	3.88
32	OS	48.03	-0.223	0.222	sap	0
32	OS	48.89	-0.082	0.224	sap	0.86
32	OS	49.93	-0.285	0.268	sap	1.89
32	OS	50.9	-0.108	0.219	sap	2.87
32	OS	51.94	-0.038	0.166	sap	3.91
33	OD	56.09	-0.205	0.201	sap	0
33	OD	56.37	-0.208	0.143	sap	0.27
33	OD	56.98	-0.263	0.174	sap	0.88
33	OD	58.06	-0.226	0.202	sap	1.97
33	OD	59.06	-0.257	0.195	sap	2.97
34	OD	50.55	0.103	0.141	sap	0
34	OD	51.62	0.152	0.125	sap	1.07
34	OD	52.71	0.055	0.105	sap	2.16
34	OD	53.45	0.243	0.14	sap	2.91
34	OD	54.54	0.229	0.122	sap	3.99
34	OD	55.61	0.157	0.093	sap	5.06
34	OS	50.55	0.111	0.135	sap	0
34	OS	51.62	0.171	0.162	sap	1.07
34	OS	52.71	0.059	0.114	sap	2.16
34	OS	53.45	0.212	0.144	sap	2.91
34	OS	54.54	0.174	0.148	sap	3.99
34	OS	55.61	0.129	0.137	sap	5.06
35	OD	51.97	-0.03	0.133	sap	0
35	OD	52.88	-0.005	0.157	sap	0.9
35	OD	53.92	0.03	0.125	sap	1.93
35	OD	55.01	-0.042	0.146	sap	3.04
35	OD	55.91	0.015	0.124	sap	3.93
35	OD	57.02	-0.03	0.114	sap	5.04
36	OD	44.98	-0.121	0.135	sap	0
36	OD	45.94	0.039	0.168	sap	0.96
36	OD	47.13	0.019	0.16	sap	2.15
36	OD	48.01	0.046	0.153	sap	3.03
36	OD	48.9	0.05	0.157	sap	3.92
36	OD	50	-0.077	0.16	sap	5.02
36	OS	45.02	-0.15	0.19	sap	0
36	OS	45.94	-0.023	0.166	sap	0.92
36	OS	47.13	0.097	0.162	sap	2.11
36	OS	48.01	-0.072	0.197	sap	2.99
36	OS	48.9	0.102	0.185	sap	3.88
36	OS	50	0.109	0.179	sap	4.98
37	OS	52.31	-0.095	0.13	sap	0
37	OS	53.46	0.013	0.147	sap	1.14
37	OS	54.4	0.033	0.13	sap	2.08
37	OS	55.24	0.073	0.176	sap	2.92
37	OS	56.32	0.055	0.149	sap	4
37	OS	57.22	0.082	0.183	sap	4.9
38	OD	55.93	0.066	0.169	sap	0
38	OD	56.95	0.167	0.117	sap	1.02
38	OD	57.89	0.005	0.125	sap	1.96
38	OD	58.91	0.075	0.176	sap	2.98
38	OD	60.02	0.113	0.145	sap	4.08
38	OS	55.93	0.096	0.091	sap	0
38	OS	56.95	0.145	0.134	sap	1.02
38	OS	57.89	0.05	0.125	sap	1.96
38	OS	58.91	0.123	0.123	sap	2.98
38	OS	60.02	0.154	0.114	sap	4.08
39	OD	48.68	-0.227	0.217	sap	0
39	OD	49.68	-0.192	0.242	sap	1
39	OD	50.7	-0.517	0.341	sap	2.01
39	OD	51.68	-0.44	0.257	sap	2.99
39	OD	52.65	-0.231	0.232	sap	3.97
40	OD	55.56	0.081	0.113	sap	0
40	OD	56.63	-0.08	0.333	sap	1.07
40	OD	57.4	0.087	0.128	sap	1.84
40	OD	58.42	0.066	0.144	sap	2.86
40	OD	59.39	-0.128	0.192	sap	3.83
40	OS	55.56	-0.098	0.146	sap	0
40	OS	56.63	-0.171	0.26	sap	1.07
40	OS	57.4	0.007	0.169	sap	1.84
40	OS	58.42	0.058	0.156	sap	2.86
40	OS	59.39	-0.063	0.151	sap	3.83
41	OS	61.93	-0.163	0.186	sap	0
41	OS	62.81	-0.261	0.218	sap	0.88
41	OS	63.81	-0.234	0.189	sap	1.88
41	OS	64.79	-0.267	0.23	sap	2.87
41	OS	66.03	-0.413	0.228	sap	4.1
42	OD	44.73	-0.017	0.223	sap	0
42	OD	45.7	-0.004	0.155	sap	0.97
42	OD	46.73	-0.002	0.136	sap	2
42	OD	47.75	-0.039	0.152	sap	3.02
42	OD	48.71	0.086	0.189	sap	3.98
42	OS	44.73	-0.078	0.154	sap	0
42	OS	45.7	-0.085	0.139	sap	0.97
42	OS	46.73	-0.008	0.169	sap	2
42	OS	47.75	-0.02	0.185	sap	3.02
42	OS	48.71	-0.016	0.153	sap	3.98
43	OD	70.48	-0.203	0.212	sap	0
43	OD	71.57	-0.272	0.304	sap	1.09
43	OD	72.53	-0.082	0.356	sap	2.05
43	OD	73.39	-0.215	0.31	sap	2.91
43	OD	74.51	-0.328	0.41	sap	4.02
44	OD	55.62	-0.015	0.103	sap	0
44	OD	56.59	-0.036	0.15	sap	0.97
44	OD	57.58	0.073	0.18	sap	1.95
44	OD	58.63	0.036	0.126	sap	3.01
44	OD	59.5	-0.004	0.166	sap	3.88
45	OD	56.96	0.11	0.141	sap	0
45	OD	57.93	0.107	0.138	sap	0.97
45	OD	58.91	0.007	0.18	sap	1.95
45	OD	60.02	0.021	0.12	sap	3.06
45	OD	60.95	0.067	0.149	sap	3.99
45	OS	56.96	0.047	0.115	sap	0
45	OS	57.93	-0.014	0.17	sap	0.97
45	OS	58.91	0.029	0.162	sap	1.95
45	OS	60.02	0.008	0.157	sap	3.06
45	OS	60.95	0.002	0.136	sap	3.99
46	OS	61.58	0.115	0.127	sap	0
46	OS	62.7	0.084	0.123	sap	1.12
46	OS	63.75	0.178	0.147	sap	2.16
46	OS	64.61	0.168	0.133	sap	3.03
46	OS	65.79	0.086	0.171	sap	4.21
47	OD	62.3	-0.029	0.15	sap	0
47	OD	63.22	-0.006	0.156	sap	0.92
47	OD	64.18	-0.04	0.155	sap	1.88
47	OD	65.16	-0.115	0.171	sap	2.86
47	OD	66.12	0.006	0.214	sap	3.82
47	OS	62.3	-0.045	0.147	sap	0
47	OS	63.22	-0.143	0.295	sap	0.92
47	OS	64.18	0.015	0.155	sap	1.88
47	OS	65.16	0.033	0.136	sap	2.86
47	OS	66.12	0.007	0.139	sap	3.82
48	OS	66.16	-0.34	0.205	sap	0
48	OS	67.24	-0.098	0.151	sap	1.07
48	OS	67.6	-0.213	0.175	sap	1.44
48	OS	68.07	-0.204	0.185	sap	1.91
48	OS	69.1	-0.138	0.145	sap	2.94
48	OS	70.15	-0.187	0.155	sap	3.99
49	OD	59.44	-0.193	0.163	sap	0
49	OD	60.34	-0.188	0.17	sap	0.9
49	OD	61.24	-0.344	0.162	sap	1.8
49	OD	62.37	-0.216	0.198	sap	2.93
49	OD	63.32	-0.129	0.182	sap	3.88
49	OS	59.44	-0.138	0.134	sap	0
49	OS	60.34	-0.244	0.181	sap	0.9
49	OS	61.24	-0.163	0.157	sap	1.81
49	OS	62.37	-0.162	0.153	sap	2.93
49	OS	63.32	-0.15	0.18	sap	3.88
50	OD	51.95	0.215	0.113	sap	0
50	OD	52.93	0.28	0.139	sap	0.97
50	OD	53.9	0.227	0.141	sap	1.95
50	OD	54.92	0.234	0.164	sap	2.96
50	OD	55.92	0.215	0.151	sap	3.96
50	OS	51.95	0.164	0.139	sap	0
50	OS	52.91	0.179	0.119	sap	0.96
50	OS	53.9	0.193	0.124	sap	1.95
50	OS	54.92	0.191	0.137	sap	2.96
50	OS	55.92	0.053	0.148	sap	3.96
51	OD	60.57	-0.093	0.147	sap	0
51	OD	61.6	-0.029	0.166	sap	1.03
51	OD	62.58	-0.019	0.15	sap	2.01
51	OD	63.56	-0.193	0.178	sap	2.99
51	OD	64.71	-0.025	0.144	sap	4.14
52	OS	46.03	0.028	0.128	sap	0
52	OS	47.38	0.085	0.137	sap	1.35
52	OS	48.06	0.194	0.194	sap	2.02
52	OS	48.95	0.193	0.141	sap	2.92
52	OS	50.07	0.11	0.181	sap	4.04
53	OS	60.9	0.009	0.151	sap	0
53	OS	61.93	0.086	0.114	sap	1.02
53	OS	62.79	0.003	0.127	sap	1.89
53	OS	63.89	0.171	0.122	sap	2.98
53	OS	64.88	0.114	0.139	sap	3.98
54	OD	53.3	0.03	0.158	sap	0
54	OD	54.33	0.102	0.125	sap	1.04
54	OD	55.23	0.002	0.108	sap	1.93
54	OD	56.12	0.069	0.138	sap	2.82
54	OD	57.38	0.081	0.139	sap	4.1
55	OD	54.93	0.1	0.105	sap	0
55	OD	55.95	0.178	0.141	sap	1.01
55	OD	56.91	0.103	0.149	sap	1.97
55	OD	57.96	0.161	0.163	sap	3.03
55	OD	58.98	0.101	0.148	sap	4.04
55	OS	54.93	0.056	0.085	sap	0
55	OS	55.95	0.108	0.128	sap	1.01
55	OS	56.91	0.053	0.138	sap	1.97
55	OS	57.96	0.127	0.121	sap	3.03
55	OS	58.98	0.154	0.172	sap	4.04
56	OS	69.12	0.036	0.167	sap	0
56	OS	70.33	0.128	0.207	sap	1.21
56	OS	70.96	0.026	0.256	sap	1.85
56	OS	72.13	0.124	0.236	sap	3.01
56	OS	73	0.097	0.179	sap	3.88
57	OS	54.51	0.159	0.115	sap	0
57	OS	55.56	0.101	0.133	sap	1.05
57	OS	56.41	0.123	0.133	sap	1.9
57	OS	57.44	-0.04	0.169	sap	2.93
57	OS	58.51	0.182	0.116	sap	4
58	OD	60.24	0.053	0.11	sap	0
58	OD	61.29	0.034	0.151	sap	1.05
58	OD	62.12	0.135	0.146	sap	1.87
58	OD	63.29	0.095	0.108	sap	3.05
58	OD	64.21	0.041	0.144	sap	3.96
58	OS	60.24	0.131	0.151	sap	0
58	OS	61.29	0.052	0.134	sap	1.05
58	OS	62.12	0.101	0.155	sap	1.87
58	OS	63.29	0.036	0.124	sap	3.05
58	OS	64.21	0.113	0.122	sap	3.96
59	OD	66.05	-0.172	0.216	sap	0
59	OD	67.02	-0.045	0.147	sap	0.97
59	OD	67.96	-0.223	0.191	sap	1.91
59	OD	69.05	-0.163	0.167	sap	3
59	OD	70.09	-0.281	0.444	sap	4.04
60	OD	66.83	0.107	0.154	sap	0
60	OD	67.42	0.056	0.158	sap	0.59
60	OD	67.81	0.098	0.177	sap	0.98
60	OD	68.74	-0.002	0.188	sap	1.91
60	OD	69.38	0.124	0.136	sap	2.56
60	OS	66.83	0.035	0.129	sap	0
60	OS	67.42	0.091	0.148	sap	0.59
60	OS	67.81	0.095	0.172	sap	0.98
60	OS	68.74	0.016	0.141	sap	1.91
60	OS	69.38	0.107	0.141	sap	2.56
61	OD	61.69	-0.032	0.136	sap	0
61	OD	62.44	0.011	0.137	sap	0.76
61	OD	63.57	-0.007	0.126	sap	1.88
61	OD	64.54	0.032	0.129	sap	2.85
61	OD	64.85	-0.013	0.154	sap	3.18
61	OD	65.81	0.053	0.124	sap	4.13
61	OD	66.52	0.059	0.129	sap	4.83
62	OD	54.95	-0.045	0.139	sap	0
62	OD	55.96	0.059	0.141	sap	1.02
62	OD	56.64	-0.082	0.216	sap	1.7
62	OD	57.8	0.111	0.104	sap	2.86
62	OD	58.22	0.079	0.157	sap	3.27
62	OD	58.73	-0.074	0.162	sap	3.79
62	OD	59.75	0.095	0.17	sap	4.8
62	OD	60.75	-0.135	0.215	sap	5.8
62	OD	61.67	0.006	0.18	sap	6.72
62	OD	62.81	0.036	0.15	sap	7.87
62	OD	63.25	-0.215	0.212	sap	8.3
62	OS	58.73	-0.215	0.224	sap	0
62	OS	59.75	0.012	0.168	sap	1.01
62	OS	60.75	-0.198	0.247	sap	2.01
62	OS	61.67	-0.051	0.194	sap	2.93
62	OS	62.81	-0.164	0.178	sap	4.08
63	OD	63.69	0.048	0.115	sap	0
63	OD	64.72	0.049	0.156	sap	1.02
63	OD	65.44	0.029	0.14	sap	1.75
63	OD	65.84	0.193	0.137	sap	2.16
63	OD	66.92	-0.023	0.184	sap	3.23
63	OD	68.22	0.077	0.152	sap	4.53
63	OD	69.23	0.122	0.145	sap	5.55
64	OS	56.32	-0.06	0.158	sap	0
64	OS	57.31	-0.072	0.169	sap	0.99
64	OS	58.26	-0.04	0.151	sap	1.93
64	OS	59.11	-0.119	0.157	sap	2.79
64	OS	59.99	-0.128	0.194	sap	3.67
64	OS	61.07	0.071	0.117	sap	4.75
64	OS	61.74	-0.023	0.159	sap	5.42
64	OS	62.25	0.011	0.133	sap	5.92
64	OS	63.19	-0.041	0.146	sap	6.86
64	OS	64.24	0.079	0.123	sap	7.92
65	OS	67.42	0.13	0.129	sap	0
65	OS	68.68	0.078	0.133	sap	1.25
65	OS	69.42	0.077	0.146	sap	2
65	OS	70.51	0.076	0.123	sap	3.09
65	OS	71.35	0.185	0.135	sap	3.93
65	OS	72.1	0.065	0.152	sap	4.68
65	OS	73.31	0.199	0.141	sap	5.89
66	OS	51.07	-0.132	0.129	sap	0
66	OS	51.56	-0.086	0.13	sap	0.48
66	OS	52.51	-0.122	0.107	sap	1.43
66	OS	53.19	-0.115	0.11	sap	2.11
66	OS	54.12	-0.019	0.117	sap	3.05
67	OD	58.5	-0.05	0.149	sap	0
67	OD	59.49	-0.066	0.129	sap	0.99
67	OD	60.64	0.085	0.181	sap	2.14
67	OD	61.51	-0.043	0.168	sap	3.01
67	OD	62.79	0.063	0.135	sap	4.29
67	OD	63.33	0.034	0.153	sap	4.84
67	OD	64.2	0.101	0.162	sap	5.7
68	OD	66.04	-0.072	0.189	sap	0
68	OD	66.59	-0.003	0.148	sap	0.55
68	OD	67.24	0.088	0.106	sap	1.19
68	OD	68.18	0.067	0.145	sap	2.13
68	OD	69.32	-0.076	0.17	sap	3.27
68	OD	69.95	-0.049	0.151	sap	3.91
68	OD	70.19	0.038	0.188	sap	4.15
68	OD	70.68	-0.053	0.166	sap	4.64
68	OD	71.33	0.058	0.139	sap	5.28
68	OS	66.04	-0.051	0.184	sap	0
68	OS	66.59	-0.087	0.146	sap	0.55
68	OS	67.24	0.105	0.112	sap	1.19
68	OS	68.18	0.029	0.185	sap	2.13
68	OS	69.32	-0.068	0.16	sap	3.27
68	OS	69.95	0.031	0.139	sap	3.91
68	OS	70.19	0.015	0.179	sap	4.15
68	OS	71.33	-0.091	0.183	sap	5.28
69	OD	65.18	0.027	0.166	sap	0
69	OD	66.06	-0.273	0.305	sap	0.88
69	OD	66.8	0	0.163	sap	1.62
69	OD	67.85	-0.093	0.204	sap	2.68
69	OD	68.79	-0.127	0.167	sap	3.62
70	OD	60.38	0.097	0.103	sap	0
70	OD	61.27	-0.022	0.168	sap	0.89
70	OD	62	-0.17	0.223	sap	1.63
70	OD	63.32	0.051	0.127	sap	2.94
70	OD	64.35	0.022	0.141	sap	3.97
70	OD	65.34	0.087	0.139	sap	4.96
70	OD	66.56	0.066	0.122	sap	6.18
70	OD	67.85	0.081	0.108	sap	7.47
70	OD	69.16	0.108	0.14	sap	8.78
70	OS	60.38	0.044	0.113	sap	0
70	OS	61.27	-0.048	0.147	sap	0.89
70	OS	62	-0.181	0.204	sap	1.63
70	OS	63.32	0.046	0.115	sap	2.94
70	OS	64.35	-0.068	0.169	sap	3.97
70	OS	65.34	0.02	0.117	sap	4.96
70	OS	66.56	0.042	0.164	sap	6.18
70	OS	67.85	0.034	0.118	sap	7.47
70	OS	69.16	-0.007	0.16	sap	8.78
71	OD	65.91	0.096	0.169	sap	0
71	OD	66.95	0.135	0.141	sap	1.05
71	OD	67.99	0.168	0.125	sap	2.08
71	OD	68.66	0.182	0.156	sap	2.75
71	OD	69.88	0.206	0.168	sap	3.97
71	OD	70.64	0.16	0.13	sap	4.73
72	OD	64.44	-0.25	0.222	sap	0
72	OD	65.47	-0.143	0.18	sap	1.03
72	OD	65.99	-0.107	0.161	sap	1.55
72	OD	66.95	-0.055	0.131	sap	2.52
72	OD	68.19	-0.165	0.174	sap	3.75
72	OS	63.29	-0.326	0.124	sap	0
72	OS	64.44	-0.236	0.159	sap	1.15
72	OS	65.47	-0.297	0.152	sap	2.18
72	OS	65.99	-0.189	0.193	sap	2.69
72	OS	66.95	-0.357	0.117	sap	3.66
72	OS	68.19	-0.31	0.156	sap	4.9
73	OD	59.78	-0.032	0.141	sap	0
73	OD	60.58	-0.077	0.162	sap	0.79
73	OD	61.78	-0.179	0.163	sap	2
73	OD	62.54	-0.06	0.135	sap	2.75
73	OD	63.88	-0.023	0.164	sap	4.1
74	OS	58.81	0.027	0.137	sap	0
74	OS	59.52	-0.127	0.178	sap	0.71
74	OS	59.96	0.133	0.161	sap	1.14
74	OS	60.75	-0.026	0.256	sap	1.94
74	OS	61.67	-0.018	0.178	sap	2.86
74	OS	62.69	0.041	0.256	sap	3.88
74	OS	63.08	-0.065	0.421	sap	4.26
74	OS	63.36	-0.046	0.494	sap	4.55
74	OS	63.58	0.003	0.487	sap	4.77
74	OS	63.98	0.028	0.301	sap	5.16
74	OS	64.25	-0.026	0.304	sap	5.44
75	OS	63.93	0.055	0.146	sap	0
75	OS	64.83	-0.036	0.183	sap	0.9
75	OS	65.06	0.023	0.131	sap	1.13
75	OS	65.56	-0.014	0.19	sap	1.64
75	OS	65.79	-0.018	0.149	sap	1.87
75	OS	66.06	-0.098	0.22	sap	2.13
75	OS	66.33	-0.137	0.203	sap	2.41
76	OD	68.33	0.077	0.144	sap	0
76	OD	68.98	-0.003	0.13	sap	0.66
76	OD	70.09	0.007	0.161	sap	1.77
76	OD	71.18	0.034	0.119	sap	2.85
76	OD	72.38	-0.021	0.102	sap	4.05
76	OD	73.42	0.046	0.153	sap	5.09
76	OD	74	0.042	0.151	sap	5.67
77	OD	67.62	-0.16	0.185	sap	0
77	OD	68.37	-0.369	0.152	sap	0.74
77	OD	69.26	-0.408	0.129	sap	1.63
77	OD	70.02	-0.157	0.176	sap	2.39
77	OD	70.96	0.053	0.179	sap	3.33
77	OD	71.82	-0.025	0.17	sap	4.2
77	OD	72.65	-0.023	0.185	sap	5.02
77	OD	73.68	-0.078	0.224	sap	6.05
77	OD	74.14	-0.171	0.194	sap	6.51
77	OD	74.7	-0.178	0.235	sap	7.07
78	OD	51.66	-0.04	0.153	sap	0
78	OD	52.36	0.096	0.134	sap	0.69
78	OD	53.44	-0.159	0.178	sap	1.79
78	OD	54.35	0.066	0.132	sap	2.69
78	OD	55.48	-0.014	0.141	sap	3.82
78	OD	56.34	0.209	0.143	sap	4.68
78	OD	57.59	0.059	0.146	sap	5.92
78	OD	58.44	0.106	0.134	sap	6.78
78	OD	59.62	0.026	0.153	sap	7.95
78	OD	60.18	0.004	0.177	sap	8.5
78	OS	51.66	-0.021	0.174	sap	0
78	OS	52.36	0.045	0.196	sap	0.69
78	OS	53.44	-0.181	0.168	sap	1.79
78	OS	54.35	0.058	0.129	sap	2.69
78	OS	55.48	0.014	0.153	sap	3.82
78	OS	56.34	0.123	0.134	sap	4.68
78	OS	57.59	0.076	0.108	sap	5.92
78	OS	58.44	-0.085	0.166	sap	6.78
78	OS	59.62	0.068	0.118	sap	7.95
78	OS	60.18	-0.011	0.136	sap	8.5
79	OS	67.36	-0.065	0.117	sap	0
79	OS	68.38	-0.092	0.259	sap	1.01
79	OS	69.43	-0.187	0.237	sap	2.07
79	OS	70.43	-0.123	0.18	sap	3.07
79	OS	71.43	-0.105	0.171	sap	4.07
79	OS	72.44	-0.422	0.424	sap	5.07
80	OD	46.61	-0.008	0.111	sap	0
80	OD	47.55	-0.075	0.126	sap	0.95
80	OD	48.54	-0.059	0.135	sap	1.94
80	OD	49.77	-0.117	0.154	sap	3.16
80	OD	50.35	0.083	0.114	sap	3.75
80	OS	46.61	0.02	0.121	sap	0
80	OS	47.55	-0.03	0.132	sap	0.95
80	OS	48.54	-0.029	0.161	sap	1.94
80	OS	49.77	-0.034	0.12	sap	3.16
80	OS	50.35	0.084	0.124	sap	3.75
81	OS	64.87	-0.085	0.155	sap	0
81	OS	66.08	-0.098	0.157	sap	1.2
81	OS	66.94	-0.023	0.137	sap	2.06
81	OS	67.98	-0.073	0.185	sap	3.1
81	OS	68.86	-0.164	0.179	sap	3.98
81	OS	70.03	-0.266	0.144	sap	5.15
81	OS	70.82	-0.27	0.143	sap	5.94
81	OS	71.33	-0.196	0.183	sap	6.46
81	OS	72.48	-0.204	0.159	sap	7.61
81	OS	73.58	-0.256	0.128	sap	8.71
81	OS	73.88	-0.274	0.145	sap	9
82	OD	40.65	-0.096	0.179	sap	0
82	OD	41.85	-0.142	0.141	sap	1.19
82	OD	42.98	-0.151	0.123	sap	2.32
82	OD	44.13	0.09	0.142	sap	3.47
82	OD	45.3	0.038	0.129	sap	4.64
83	OD	65.05	0.019	0.127	sap	0
83	OD	66.04	0.101	0.12	sap	0.98
83	OD	66.92	0.051	0.135	sap	1.87
83	OD	67.73	0.186	0.11	sap	2.68
83	OD	68.95	0.117	0.127	sap	3.9
83	OD	69.98	0.116	0.12	sap	4.93
83	OD	71.15	0.175	0.143	sap	6.09
83	OD	71.56	0.162	0.132	sap	6.51
83	OD	72.71	0.208	0.157	sap	7.66
84	OD	54.7	-0.1	0.123	sap	0
84	OD	55.84	0.021	0.14	sap	1.13
84	OD	56.92	-0.041	0.181	sap	2.21
84	OD	57.87	-0.032	0.202	sap	3.17
84	OD	59	0.021	0.124	sap	4.29
84	OD	60.09	0.027	0.108	sap	5.38
84	OS	54.7	-0.188	0.143	sap	0
84	OS	55.84	-0.113	0.142	sap	1.13
84	OS	56.92	-0.049	0.142	sap	2.21
84	OS	57.87	-0.086	0.125	sap	3.17
84	OS	59	-0.039	0.139	sap	4.29
84	OS	60.09	-0.152	0.149	sap	5.38
85	OD	51.88	0.101	0.133	sap	0
85	OD	52.87	0.132	0.133	sap	0.98
85	OD	53.9	0.123	0.165	sap	2.02
85	OD	54.74	0.061	0.15	sap	2.85
85	OD	55.24	0.003	0.105	sap	3.35
85	OD	56.37	0.12	0.154	sap	4.47
85	OD	57.31	0.109	0.161	sap	5.42
85	OD	57.8	0.117	0.136	sap	5.91
85	OD	58.32	0.095	0.149	sap	6.43
85	OD	59.16	0.054	0.147	sap	7.27
85	OD	59.93	0.154	0.234	sap	8.05
85	OS	51.88	0.074	0.131	sap	0
85	OS	52.87	0.14	0.131	sap	0.98
85	OS	53.9	0.073	0.15	sap	2.02
85	OS	54.74	0.018	0.109	sap	2.85
85	OS	55.24	0.074	0.151	sap	3.35
85	OS	56.37	0.139	0.136	sap	4.47
85	OS	57.31	0.039	0.166	sap	5.42
85	OS	57.8	0.128	0.179	sap	5.91
85	OS	58.32	0.123	0.184	sap	6.43
85	OS	59.16	0.023	0.164	sap	7.27
85	OS	59.93	0.091	0.171	sap	8.05
86	OD	65.96	-0.274	0.111	sap	0
86	OD	67.24	-0.355	0.155	sap	1.28
86	OD	67.84	-0.409	0.15	sap	1.88
86	OD	68.78	-0.338	0.156	sap	2.81
86	OD	69.89	-0.341	0.161	sap	3.93
86	OD	70.91	-0.291	0.167	sap	4.95
86	OD	71.41	-0.27	0.175	sap	5.44
86	OD	71.96	-0.232	0.194	sap	6
87	OS	71.7	-0.052	0.125	sap	0
87	OS	72.33	-0.112	0.147	sap	0.62
87	OS	73.33	-0.103	0.152	sap	1.62
87	OS	74.27	-0.15	0.152	sap	2.56
87	OS	75.31	-0.182	0.15	sap	3.6
87	OS	76.48	-0.125	0.152	sap	4.78
87	OS	77.8	-0.153	0.204	sap	6.1
88	OS	68.23	0.105	0.172	sap	0
88	OS	68.49	0.132	0.164	sap	0.26
88	OS	68.74	0.102	0.157	sap	0.5
88	OS	69.03	0.068	0.167	sap	0.81
88	OS	69.61	0.064	0.185	sap	1.38
88	OS	69.85	0.091	0.188	sap	1.63
89	OD	52.5	-0.006	0.157	sap	0
89	OD	53.2	-0.046	0.243	sap	0.69
89	OD	54.22	-0.156	0.192	sap	1.7
89	OD	55.32	-0.096	0.207	sap	2.82
89	OD	56.19	-0.065	0.154	sap	3.68
89	OD	57.34	0.116	0.167	sap	4.83
89	OS	53.2	-0.059	0.177	sap	0
89	OS	54.22	-0.127	0.165	sap	1.02
89	OS	55.33	-0.276	0.249	sap	2.14
89	OS	56.19	-0.191	0.246	sap	2.99
89	OS	57.34	-0.041	0.19	sap	4.15
90	OD	65.62	-0.025	0.149	sap	0
90	OD	66.62	-0.018	0.126	sap	1
90	OD	67.57	-0.002	0.162	sap	1.95
90	OD	68.67	-0.037	0.149	sap	3.04
90	OD	69.81	-0.041	0.15	sap	4.2
90	OS	64.63	0.029	0.127	sap	0
90	OS	65.62	-0.042	0.183	sap	0.99
90	OS	66.62	-0.13	0.18	sap	1.99
90	OS	67.59	0.01	0.115	sap	2.96
90	OS	68.67	-0.079	0.171	sap	4.04
90	OS	69.81	-0.091	0.156	sap	5.19
91	OD	60.12	-0.116	0.156	sap	0
91	OD	61.19	-0.011	0.128	sap	1.07
91	OD	62.01	-0.018	0.172	sap	1.9
91	OD	62.96	-0.133	0.165	sap	2.84
91	OD	64.29	-0.074	0.153	sap	4.17
92	OD	54.56	-0.053	0.155	sap	0
92	OD	55.65	0.078	0.12	sap	1.09
92	OD	56.65	-0.025	0.162	sap	2.1
92	OD	57.85	-0.118	0.151	sap	3.29
92	OD	58.79	0.055	0.198	sap	4.23
93	OD	50.03	-0.106	0.108	sap	0
93	OD	50.98	-0.066	0.182	sap	0.95
93	OD	51.97	0.097	0.117	sap	1.94
93	OD	52.88	-0.023	0.178	sap	2.86
93	OD	53.85	-0.046	0.135	sap	3.82
93	OD	54.32	0	0.136	sap	4.28
93	OD	54.82	-0.002	0.118	sap	4.79
93	OD	56.13	-0.071	0.179	sap	6.1
93	OD	56.95	-0.193	0.41	sap	6.92
93	OD	57.99	-0.04	0.201	sap	7.95
93	OD	58.68	0.124	0.13	sap	8.65
93	OD	59.06	-0.002	0.153	sap	9.02
93	OS	50.03	-0.054	0.177	sap	0
93	OS	50.98	-0.286	0.176	sap	0.95
93	OS	51.97	-0.006	0.172	sap	1.94
93	OS	52.88	-0.015	0.147	sap	2.86
93	OS	53.85	-0.041	0.2	sap	3.82
93	OS	54.32	-0.255	0.29	sap	4.28
93	OS	54.82	-0.066	0.197	sap	4.79
93	OS	56.13	0.017	0.116	sap	6.1
93	OS	56.95	-0.085	0.24	sap	6.92
93	OS	57.99	-0.091	0.175	sap	7.95
93	OS	58.68	0.019	0.171	sap	8.65
93	OS	59.06	-0.07	0.182	sap	9.02
94	OD	60.36	0.086	0.194	sap	0
94	OD	61.35	-0.106	0.172	sap	0.98
94	OD	62.68	0.157	0.135	sap	2.33
94	OD	63.68	0.155	0.134	sap	3.33
94	OD	64.87	0.234	0.172	sap	4.51
94	OD	65.12	0.177	0.127	sap	4.76
94	OD	66.01	0.069	0.139	sap	5.65
94	OD	66.99	0.202	0.144	sap	6.62
94	OS	61.35	0.07	0.166	sap	0
94	OS	62.68	0.09	0.15	sap	1.35
94	OS	63.67	0.032	0.19	sap	2.33
94	OS	64.86	0.113	0.124	sap	3.52
94	OS	65.12	0.097	0.147	sap	3.78
94	OS	66.01	0.086	0.162	sap	4.67
94	OS	66.99	0.161	0.11	sap	5.64
95	OD	62.53	0.013	0.133	sap	0
95	OD	63.54	0.071	0.118	sap	1.01
95	OD	64.52	-0.025	0.132	sap	1.99
95	OD	65.38	0.008	0.123	sap	2.86
95	OD	66.33	-0.006	0.136	sap	3.8
96	OS	66.22	-0.336	0.199	sap	0
96	OS	66.91	-0.167	0.179	sap	0.7
96	OS	67.81	-0.113	0.178	sap	1.6
96	OS	69.12	-0.787	0.499	sap	2.9
96	OS	69.56	-0.688	0.506	sap	3.33
96	OS	70.25	-0.751	0.526	sap	4.03
96	OS	71.59	-0.755	0.497	sap	5.37
96	OS	72.99	-0.895	0.761	sap	6.77
97	OS	65.02	-0.073	0.178	sap	0
97	OS	66.01	-0.086	0.172	sap	0.98
97	OS	67.16	-0.11	0.175	sap	2.13
97	OS	68.02	-0.128	0.175	sap	2.99
97	OS	68.95	-0.073	0.188	sap	3.93
97	OS	69.84	0	0.16	sap	4.82
97	OS	70.57	0.093	0.196	sap	5.54
97	OS	71.22	0.068	0.135	sap	6.19
97	OS	72.06	0.037	0.174	sap	7.04
97	OS	73.01	0.023	0.182	sap	7.98
97	OS	74.16	0.045	0.177	sap	9.13
98	OD	52.09	0.142	0.123	sap	0
98	OD	53.47	0.139	0.127	sap	1.38
98	OD	54.53	0.132	0.104	sap	2.43
98	OD	55.6	0.132	0.1	sap	3.5
98	OD	56.41	0.108	0.136	sap	4.31
98	OD	57.7	0.127	0.097	sap	5.59
98	OS	52.09	0.098	0.121	sap	0
98	OS	53.47	0.057	0.134	sap	1.38
98	OS	54.53	0.108	0.124	sap	2.43
98	OS	55.6	0.196	0.124	sap	3.5
98	OS	56.41	0.158	0.123	sap	4.31
98	OS	57.7	0.058	0.11	sap	5.59
99	OD	43.9	0.051	0.145	sap	0
99	OD	44.88	-0.056	0.152	sap	0.97
99	OD	45.87	0.035	0.158	sap	1.96
99	OD	46.81	0.063	0.121	sap	2.91
99	OD	47.71	-0.052	0.135	sap	3.81
99	OD	48.84	-0.3	0.161	sap	4.93
99	OD	49.36	0.089	0.106	sap	5.46
99	OD	49.82	0.044	0.098	sap	5.91
99	OD	50.83	0.118	0.115	sap	6.92
99	OD	51.99	0.103	0.1	sap	8.08
99	OD	52.99	0.02	0.119	sap	9.08
99	OD	53.72	0.042	0.122	sap	9.81
99	OS	44.88	0.023	0.117	sap	0
99	OS	45.87	0.047	0.138	sap	0.99
99	OS	46.81	0.077	0.118	sap	1.93
99	OS	47.71	0.091	0.108	sap	2.84
99	OS	48.8	-0.159	0.204	sap	3.92
99	OS	49.36	0.001	0.173	sap	4.48
99	OS	49.82	0.008	0.127	sap	4.94
99	OS	50.83	0.048	0.125	sap	5.95
99	OS	51.99	-0.092	0.272	sap	7.11
99	OS	52.99	0.036	0.126	sap	8.11
99	OS	53.72	0.009	0.115	sap	8.84
100	OD	68.62	-0.169	0.194	sap	0
100	OD	69.57	-0.022	0.134	sap	0.95
100	OD	70.59	-0.225	0.192	sap	1.97
100	OD	71.58	-0.339	0.335	sap	2.96
100	OD	72.21	-0.582	0.409	sap	3.6
100	OD	73.39	-0.393	0.257	sap	4.77
100	OD	74.09	-0.459	0.245	sap	5.48
100	OD	74.68	-0.521	0.355	sap	6.05
100	OD	75.78	-0.278	0.291	sap	7.17
100	OD	76.16	-0.205	0.334	sap	7.54
100	OD	76.65	-0.235	0.237	sap	8.03
100	OS	68.67	-0.211	0.184	sap	0
100	OS	69.57	-0.463	0.215	sap	0.9
100	OS	70.59	-0.461	0.23	sap	1.93
100	OS	71.58	-0.558	0.267	sap	2.91
100	OS	72.21	-0.835	0.571	sap	3.55
100	OS	73.39	-0.298	0.267	sap	4.73
100	OS	74.09	-0.5	0.452	sap	5.43
100	OS	74.68	-0.39	0.404	sap	6.01
100	OS	75.78	-0.451	0.39	sap	7.12
100	OS	76.16	-0.274	0.31	sap	7.5
100	OS	76.65	-0.374	0.275	sap	7.98
101	OD	43.51	0.057	0.147	sap	0
101	OD	44.43	0.053	0.143	sap	0.92
101	OD	45.36	0.107	0.129	sap	1.84
101	OD	46.66	0.067	0.124	sap	3.14
101	OD	47.91	0.004	0.142	sap	4.38
101	OD	49.25	0.043	0.14	sap	5.72
101	OD	50.4	0.088	0.152	sap	6.88
101	OD	51.53	0.183	0.171	sap	8.01
101	OD	52.47	0.101	0.158	sap	8.95
101	OS	43.59	0.031	0.158	sap	0
101	OS	44.43	0.032	0.16	sap	0.84
101	OS	45.36	-0.01	0.141	sap	1.76
101	OS	46.66	0.036	0.15	sap	3.06
101	OS	47.91	-0.003	0.166	sap	4.3
101	OS	49.25	0.003	0.165	sap	5.64
101	OS	50.4	-0.002	0.158	sap	6.8
101	OS	51.53	0.08	0.155	sap	7.93
101	OS	52.47	0.015	0.215	sap	8.87
102	OD	53.87	-0.03	0.156	sap	0
102	OD	54.9	-0.089	0.143	sap	1.03
102	OD	56.12	-0.059	0.187	sap	2.26
102	OD	56.63	0.034	0.182	sap	2.76
102	OD	57.59	-0.262	0.179	sap	3.72
102	OD	58.62	-0.228	0.235	sap	4.75
102	OS	53.87	-0.086	0.207	sap	0
102	OS	54.9	-0.162	0.372	sap	1.03
102	OS	56.12	-0.138	0.197	sap	2.26
102	OS	56.63	-0.02	0.338	sap	2.76
102	OS	57.59	-0.17	0.397	sap	3.72
102	OS	58.62	-0.368	0.325	sap	4.75
103	OS	49.08	-0.055	0.128	sap	0
103	OS	50.18	-0.29	0.234	sap	1.1
103	OS	51.24	-0.164	0.227	sap	2.15
103	OS	52.06	-0.013	0.164	sap	2.98
103	OS	53.16	-0.154	0.184	sap	4.07
103	OS	53.97	0.021	0.191	sap	4.88
103	OS	54.62	-0.028	0.126	sap	5.53
104	OD	68.54	-0.028	0.15	sap	0
104	OD	69.47	0.089	0.145	sap	0.94
104	OD	70.38	0.02	0.143	sap	1.84
104	OD	71.24	-0.007	0.153	sap	2.68
104	OD	72.47	0.049	0.134	sap	3.93
105	OS	67.67	0.188	0.157	sap	0
105	OS	68.63	-0.028	0.138	sap	0.96
105	OS	69.22	-0.026	0.178	sap	1.54
105	OS	70.41	-0.121	0.141	sap	2.74
105	OS	71	-0.152	0.182	sap	3.32
106	OD	38.98	-0.083	0.13	sap	0
106	OD	39.79	-0.274	0.235	sap	0.81
106	OD	40.87	-0.153	0.154	sap	1.89
106	OD	41.9	-0.099	0.131	sap	2.92
106	OD	42.83	-0.088	0.148	sap	3.85
107	OD	61.47	-0.158	0.169	sap	0
107	OD	62.39	-0.3	0.28	sap	0.92
107	OD	63.66	0.026	0.157	sap	2.19
107	OD	64.44	-0.059	0.21	sap	2.96
107	OD	65.56	0.042	0.197	sap	4.09
107	OD	66.44	-0.004	0.142	sap	4.97
107	OD	67.05	-0.138	0.215	sap	5.56
107	OD	68.01	-0.038	0.144	sap	6.53
107	OD	69.35	-0.027	0.124	sap	7.87
107	OD	69.75	0.013	0.147	sap	8.27
107	OD	70.35	-0.169	0.191	sap	8.86
108	OS	49.43	-0.309	0.177	sap	0
108	OS	50.13	0.005	0.178	sap	0.71
108	OS	51.07	-0.113	0.179	sap	1.64
108	OS	52.18	-0.179	0.156	sap	2.75
108	OS	53.25	-0.069	0.168	sap	3.83
108	OS	54.24	-0.019	0.189	sap	4.81
108	OS	55.19	-0.073	0.171	sap	5.77
109	OD	62.34	0.127	0.146	sap	0
109	OD	63.13	-0.028	0.109	sap	0.79
109	OD	64.15	0.063	0.123	sap	1.81
109	OD	65.2	0.048	0.127	sap	2.86
109	OD	66.33	0.021	0.139	sap	3.99
109	OD	67.35	0.048	0.179	sap	5.01
109	OD	68.44	0.082	0.16	sap	6.09
109	OS	61.72	0.071	0.148	sap	0
109	OS	62.34	0.115	0.174	sap	0.63
109	OS	63.13	0.121	0.123	sap	1.42
109	OS	64.15	0.071	0.126	sap	2.44
109	OS	65.2	0.109	0.124	sap	3.49
109	OS	66.33	0.048	0.129	sap	4.62
109	OS	67.35	0.069	0.153	sap	5.64
109	OS	68.44	0.027	0.159	sap	6.72
110	OD	57.44	0.15	0.121	sap	0
110	OD	58.45	0.082	0.117	sap	1.01
110	OD	59.63	0.112	0.145	sap	2.19
110	OD	60.36	0.172	0.121	sap	2.92
110	OD	61.36	0.196	0.181	sap	3.92
110	OS	57.44	0.174	0.143	sap	0
110	OS	58.46	0.086	0.138	sap	1.02
110	OS	59.63	0.082	0.194	sap	2.19
110	OS	60.36	0.131	0.156	sap	2.92
110	OS	61.36	0.153	0.132	sap	3.92
111	OD	47.99	-0.07	0.126	sap	0
111	OD	48.86	0.086	0.155	sap	0.87
111	OD	49.82	0.114	0.17	sap	1.82
111	OD	50.95	0.045	0.142	sap	2.95
111	OD	51.23	0.094	0.125	sap	3.23
111	OD	51.94	0.078	0.139	sap	3.95
111	OS	46.96	-0.087	0.131	sap	0
111	OS	47.99	-0.061	0.127	sap	1.04
111	OS	48.86	0.025	0.143	sap	1.9
111	OS	49.82	0.091	0.129	sap	2.86
111	OS	50.95	-0.084	0.139	sap	3.99
111	OS	51.23	0.006	0.124	sap	4.27
111	OS	51.94	0.031	0.162	sap	4.98
112	OD	67.62	0.075	0.174	sap	0
112	OD	68.69	0.06	0.141	sap	1.07
112	OD	69.44	0.049	0.111	sap	1.81
112	OD	70.36	0.071	0.154	sap	2.74
112	OD	71.64	0.116	0.14	sap	4.01
112	OD	72.27	0.003	0.131	sap	4.65
112	OD	72.79	-0.005	0.155	sap	5.16
112	OD	73.29	0.129	0.145	sap	5.67
112	OD	74.31	0.062	0.142	sap	6.69
112	OD	75.52	0.074	0.112	sap	7.89
112	OD	76.48	0.055	0.135	sap	8.85
112	OD	77.24	-0.029	0.127	sap	9.61
112	OS	67.62	0.023	0.166	sap	0
112	OS	68.69	-0.005	0.156	sap	1.07
112	OS	69.44	0.019	0.155	sap	1.81
112	OS	70.36	0.071	0.131	sap	2.74
112	OS	71.64	0.098	0.171	sap	4.01
112	OS	72.27	0.013	0.169	sap	4.65
112	OS	72.79	-0.049	0.149	sap	5.16
112	OS	73.29	0.085	0.122	sap	5.67
112	OS	74.31	0.02	0.153	sap	6.69
112	OS	75.52	-0.091	0.171	sap	7.89
112	OS	76.48	-0.004	0.174	sap	8.85
112	OS	77.24	-0.039	0.167	sap	9.61
113	OS	44.66	0.094	0.134	sap	0
113	OS	45.64	0.176	0.116	sap	0.98
113	OS	46.58	0.191	0.117	sap	1.92
113	OS	47.69	0.148	0.13	sap	3.03
113	OS	48.76	0.047	0.132	sap	4.1
113	OS	49.96	-0.008	0.128	sap	5.29
113	OS	51.05	0.165	0.106	sap	6.39
113	OS	52.17	0.126	0.135	sap	7.52
114	OD	64.42	0.087	0.13	sap	0
114	OD	65.49	0.078	0.123	sap	1.07
114	OD	66.24	-0.079	0.216	sap	1.83
114	OD	67.37	0.042	0.132	sap	2.95
114	OD	68.21	0.126	0.154	sap	3.8
114	OD	68.85	0.131	0.115	sap	4.44
114	OD	69.25	0.11	0.133	sap	4.83
114	OD	70.35	0.195	0.144	sap	5.93
114	OD	71.31	0.143	0.126	sap	6.89
114	OD	72.33	0.034	0.136	sap	7.91
114	OD	73.44	0.14	0.135	sap	9.01
114	OS	64.38	0.032	0.137	sap	0
114	OS	65.49	-0.11	0.192	sap	1.11
114	OS	66.24	-0.05	0.157	sap	1.87
114	OS	67.37	-0.073	0.171	sap	2.99
114	OS	68.21	-0.002	0.132	sap	3.84
114	OS	68.85	0.094	0.127	sap	4.48
114	OS	69.25	-0.068	0.132	sap	4.87
114	OS	70.35	0.095	0.13	sap	5.97
114	OS	71.31	0.068	0.137	sap	6.93
114	OS	72.33	-0.033	0.165	sap	7.95
114	OS	73.44	-0.105	0.162	sap	9.05
115	OD	69.84	0.035	0.154	sap	0
115	OD	70.79	-0.124	0.155	sap	0.95
115	OD	71.75	0.041	0.19	sap	1.91
115	OD	72.62	0.011	0.174	sap	2.78
115	OD	73.72	-0.084	0.192	sap	3.87
115	OD	74.39	0.027	0.159	sap	4.55
115	OD	74.91	0.115	0.175	sap	5.06
115	OD	76.16	0.048	0.143	sap	6.32
115	OD	77.09	-0.054	0.17	sap	7.25
116	OD	37.81	-0.161	0.164	sap	0
116	OD	38.41	-0.273	0.117	sap	0.61
116	OD	39.7	-0.226	0.164	sap	1.89
116	OD	40.55	-0.152	0.173	sap	2.75
116	OD	41.6	-0.129	0.158	sap	3.79
116	OS	37.81	-0.278	0.185	sap	0
116	OS	38.41	-0.317	0.15	sap	0.61
116	OS	39.7	-0.367	0.18	sap	1.89
116	OS	40.55	-0.235	0.155	sap	2.75
116	OS	41.6	-0.204	0.163	sap	3.79
117	OD	68.2	-0.016	0.134	sap	0
117	OD	68.96	-0.04	0.182	sap	0.77
117	OD	70.16	-0.135	0.181	sap	1.96
117	OD	71.07	-0.078	0.152	sap	2.87
117	OD	71.96	-0.085	0.145	sap	3.76
117	OD	72.93	-0.089	0.137	sap	4.74
117	OD	74.03	0.053	0.181	sap	5.83
117	OD	74.88	0.051	0.149	sap	6.69
117	OD	75.89	-0.011	0.161	sap	7.69
117	OD	76.91	0.02	0.173	sap	8.71
117	OS	68.2	-0.029	0.163	sap	0
117	OS	68.96	-0.107	0.184	sap	0.77
117	OS	70.16	-0.046	0.108	sap	1.96
117	OS	71.07	-0.104	0.173	sap	2.87
117	OS	71.96	-0.137	0.142	sap	3.76
117	OS	72.93	-0.111	0.155	sap	4.74
117	OS	74.03	0.005	0.192	sap	5.83
117	OS	74.88	0.089	0.174	sap	6.69
117	OS	75.89	-0.12	0.208	sap	7.69
117	OS	76.91	-0.02	0.196	sap	8.71
118	OD	68.09	-0.061	0.133	sap	0
118	OD	69.03	-0.072	0.164	sap	0.95
118	OD	70.01	-0.074	0.157	sap	1.92
118	OD	70.96	-0.184	0.14	sap	2.88
118	OD	72.05	-0.2	0.137	sap	3.97
118	OD	72.61	0.038	0.131	sap	4.53
118	OD	73.05	0.034	0.118	sap	4.96
118	OS	68.09	-0.084	0.133	sap	0
118	OS	69.03	-0.108	0.149	sap	0.95
118	OS	70.01	-0.203	0.137	sap	1.92
118	OS	70.96	-0.239	0.171	sap	2.88
118	OS	72.05	-0.232	0.19	sap	3.97
118	OS	72.61	0.019	0.153	sap	4.53
118	OS	73.05	0.058	0.134	sap	4.96
119	OD	45.86	0.195	0.113	sap	0
119	OD	46.63	0.186	0.115	sap	0.78
119	OD	47.58	0.227	0.139	sap	1.73
119	OD	48.75	0.177	0.149	sap	2.9
119	OD	50.08	0.043	0.152	sap	4.21
119	OD	50.34	0.272	0.151	sap	4.49
119	OD	51.28	0.158	0.116	sap	5.42
119	OD	52.34	0.217	0.111	sap	6.49
119	OD	53.39	0.028	0.154	sap	7.54
119	OD	54.4	0.236	0.134	sap	8.55
119	OD	54.93	0.203	0.13	sap	9.07
119	OD	55.35	0.239	0.124	sap	9.5
119	OS	45.86	0.193	0.101	sap	0
119	OS	46.63	0.158	0.143	sap	0.78
119	OS	47.58	0.225	0.134	sap	1.73
119	OS	48.75	0.204	0.134	sap	2.9
119	OS	50.08	0.078	0.15	sap	4.21
119	OS	50.34	0.181	0.139	sap	4.49
119	OS	51.28	0.162	0.15	sap	5.42
119	OS	52.34	0.062	0.161	sap	6.49
119	OS	53.39	0.002	0.162	sap	7.54
119	OS	54.4	0.22	0.134	sap	8.55
119	OS	54.93	0.133	0.151	sap	9.07
119	OS	55.35	0.181	0.132	sap	9.5
120	OS	40.08	-0.141	0.165	sap	0
120	OS	41.24	-0.085	0.13	sap	1.16
120	OS	42.39	-0.123	0.163	sap	2.3
120	OS	43.22	-0.133	0.185	sap	3.13
120	OS	44.52	-0.028	0.207	sap	4.43
120	OS	45.2	-0.079	0.186	sap	5.12
120	OS	46.35	-0.009	0.136	sap	6.26
121	OD	50.48	-0.241	0.164	sap	0
121	OD	51.43	-0.287	0.243	sap	0.95
121	OD	52.52	-0.324	0.193	sap	2.03
121	OD	53.32	-0.219	0.158	sap	2.83
121	OD	54.03	-0.154	0.163	sap	3.54
121	OD	54.65	-0.123	0.143	sap	4.15
121	OD	55.59	-0.144	0.169	sap	5.1
121	OD	56.55	-0.008	0.241	sap	6.06
121	OD	57.33	-0.103	0.155	sap	6.84
121	OS	50.52	-0.206	0.131	sap	0
121	OS	51.43	-0.297	0.14	sap	0.92
121	OS	52.52	-0.275	0.165	sap	2
121	OS	53.32	-0.215	0.202	sap	2.8
121	OS	54.03	-0.169	0.134	sap	3.51
121	OS	54.65	-0.2	0.133	sap	4.12
121	OS	55.59	-0.06	0.129	sap	5.07
121	OS	56.55	-0.107	0.144	sap	6.03
121	OS	57.33	-0.136	0.176	sap	6.81
122	OD	69.88	-0.005	0.152	sap	0
122	OD	70.9	-0.116	0.212	sap	1.02
122	OD	71.81	0.034	0.166	sap	1.93
122	OD	72.95	-0.044	0.224	sap	3.07
122	OD	73.84	-0.319	0.429	sap	3.96
122	OD	74.45	-0.26	0.585	sap	4.56
122	OD	75.53	-0.092	0.23	sap	5.64
122	OD	76.64	-0.098	0.343	sap	6.75
122	OD	77.63	0.002	0.178	sap	7.74
122	OS	69.88	0.01	0.147	sap	0
122	OS	70.9	-0.085	0.192	sap	1.02
122	OS	71.81	-0.065	0.171	sap	1.93
122	OS	72.95	0.056	0.121	sap	3.07
122	OS	73.84	-0.097	0.187	sap	3.96
122	OS	74.45	-0.155	0.16	sap	4.56
122	OS	75.53	-0.034	0.155	sap	5.64
122	OS	76.64	0.088	0.171	sap	6.75
122	OS	77.63	0.025	0.167	sap	7.74
123	OD	45.37	0.103	0.151	sap	0
123	OD	46.38	0.073	0.16	sap	1.01
123	OD	47.07	0.063	0.141	sap	1.69
123	OD	48.12	0.129	0.157	sap	2.75
123	OD	48.87	0.082	0.15	sap	3.49
123	OD	49.72	-0.021	0.127	sap	4.34
123	OD	50.33	0.12	0.165	sap	4.96
123	OD	51.46	-0.008	0.148	sap	6.08
123	OD	52.34	0.137	0.14	sap	6.97
123	OD	53.03	0.133	0.161	sap	7.64
123	OD	53.92	0.052	0.128	sap	8.54
123	OS	45.37	0.015	0.138	sap	0
123	OS	46.38	0.059	0.143	sap	1.01
123	OS	47.07	0.025	0.119	sap	1.69
123	OS	48.12	-0.029	0.151	sap	2.75
123	OS	48.87	0.009	0.141	sap	3.49
123	OS	49.72	-0.123	0.122	sap	4.34
123	OS	50.33	-0.031	0.139	sap	4.96
123	OS	51.46	-0.01	0.134	sap	6.08
123	OS	52.34	0.097	0.139	sap	6.97
123	OS	53.03	0.049	0.141	sap	7.64
123	OS	53.92	0.059	0.125	sap	8.54
124	OS	51.63	-0.045	0.17	sap	0
124	OS	52.64	0.085	0.149	sap	1.01
124	OS	53.55	-0.011	0.178	sap	1.92
124	OS	54.58	0.017	0.153	sap	2.96
124	OS	55.46	-0.031	0.163	sap	3.82
124	OS	56.21	-0.033	0.132	sap	4.58
124	OS	56.67	0.012	0.159	sap	5.04
124	OS	57.64	0.016	0.176	sap	6.01
124	OS	58.6	-0.031	0.133	sap	6.97
124	OS	59.12	0.028	0.14	sap	7.49
124	OS	59.72	0.074	0.129	sap	8.09
124	OS	60.24	0.03	0.168	sap	8.6
124	OS	60.62	0.034	0.146	sap	8.99
125	OD	57.2	0.058	0.096	sap	0
125	OD	58.11	-0.056	0.137	sap	0.91
125	OD	58.96	-0.004	0.146	sap	1.77
125	OD	60	0.078	0.13	sap	2.81
125	OD	61.23	-0.134	0.149	sap	4.03
125	OD	62.55	-0.072	0.122	sap	5.36
125	OD	63.78	-0.103	0.115	sap	6.58
125	OS	57.13	-0.026	0.174	sap	0
125	OS	58.11	-0.004	0.161	sap	0.98
125	OS	58.96	0.054	0.128	sap	1.84
125	OS	60	0.034	0.144	sap	2.88
125	OS	61.23	0.05	0.129	sap	4.1
125	OS	62.55	-0.027	0.123	sap	5.43
125	OS	63.78	0.061	0.103	sap	6.65
126	OD	59.74	0.031	0.158	sap	0
126	OD	60.81	-0.135	0.179	sap	1.07
126	OD	61.63	-0.168	0.291	sap	1.88
126	OD	62.68	0.018	0.148	sap	2.94
126	OD	63.63	-0.091	0.147	sap	3.89
126	OD	64.61	-0.086	0.184	sap	4.87
126	OD	65.67	0.121	0.162	sap	5.93
126	OD	66.74	-0.136	0.168	sap	7
126	OD	67.62	-0.261	0.291	sap	7.87
127	OS	58.21	-0.123	0.122	sap	0
127	OS	58.98	-0.159	0.152	sap	0.77
127	OS	59.8	-0.073	0.142	sap	1.6
127	OS	60.95	-0.143	0.164	sap	2.75
127	OS	62.27	-0.122	0.154	sap	4.06
127	OS	63.2	0.038	0.16	sap	4.99
128	OS	48.5	0.06	0.12	sap	0
128	OS	49.16	0.149	0.144	sap	0.65
128	OS	50.2	-0.044	0.158	sap	1.69
128	OS	51.34	0.004	0.11	sap	2.84
128	OS	52.31	0.133	0.121	sap	3.81
128	OS	53.46	0.153	0.128	sap	4.96
129	OD	65.21	-0.097	0.156	sap	0
129	OD	65.61	-0.168	0.213	sap	0.39
129	OD	66.46	-0.451	0.179	sap	1.24
129	OD	67.48	-0.162	0.194	sap	2.26
129	OD	68.13	-0.224	0.212	sap	2.91
130	OS	66.57	-0.087	0.183	sap	0
130	OS	67.6	0.021	0.203	sap	1.03
130	OS	68.35	-0.08	0.254	sap	1.78
130	OS	69.35	-0.074	0.179	sap	2.79
130	OS	70.1	-0.082	0.182	sap	3.53
130	OS	70.65	0.035	0.178	sap	4.07
130	OS	71.16	0.045	0.147	sap	4.59
130	OS	72.13	-0.001	0.202	sap	5.57
130	OS	73.3	-0.065	0.264	sap	6.73
131	OS	69.62	-0.199	0.161	sap	0
131	OS	70.51	-0.339	0.236	sap	0.89
131	OS	71.52	-0.223	0.209	sap	1.89
131	OS	72.68	-0.34	0.24	sap	3.06
131	OS	73.61	-0.101	0.161	sap	3.99
131	OS	74.61	-0.339	0.286	sap	4.99
132	OD	32.27	0.046	0.162	sap	0
132	OD	33.29	-0.121	0.131	sap	1.01
132	OD	34.14	-0.01	0.15	sap	1.87
132	OD	34.67	-0.021	0.131	sap	2.38
132	OD	35.53	0.025	0.144	sap	3.25
132	OD	36.75	0.072	0.153	sap	4.47
132	OD	37.79	0.015	0.144	sap	5.5
132	OS	32.33	-0.03	0.107	sap	0
132	OS	33.29	-0.07	0.142	sap	0.96
132	OS	34.14	-0.084	0.16	sap	1.81
132	OS	34.67	-0.119	0.128	sap	2.33
132	OS	35.53	-0.081	0.148	sap	3.19
132	OS	36.75	-0.041	0.161	sap	4.41
132	OS	37.79	-0.032	0.158	sap	5.45
133	OD	61.78	-0.019	0.155	sap	0
133	OD	62.56	-0.068	0.152	sap	0.76
133	OD	63.48	-0.059	0.183	sap	1.68
133	OD	64.55	-0.031	0.199	sap	2.75
133	OD	65.19	-0.033	0.159	sap	3.4
133	OD	65.69	0.036	0.152	sap	3.9
133	OD	66.84	-0.085	0.154	sap	5.05
133	OD	67.8	-0.106	0.19	sap	6.01
133	OS	61.78	-0.094	0.196	sap	0
133	OS	62.56	-0.192	0.193	sap	0.76
133	OS	63.48	-0.225	0.218	sap	1.68
133	OS	64.55	-0.43	0.265	sap	2.75
133	OS	65.19	-0.503	0.332	sap	3.4
133	OS	65.69	-0.437	0.347	sap	3.9
133	OS	66.84	-0.475	0.325	sap	5.05
133	OS	67.8	-0.612	0.273	sap	6.01
133	OS	68.89	-0.462	0.298	sap	7.1
133	OS	69.12	-0.466	0.372	sap	7.32
133	OS	69.76	-0.498	0.507	sap	7.96
134	OS	53.49	0.022	0.127	sap	0
134	OS	54.6	0.079	0.157	sap	1.11
134	OS	55.49	-0.106	0.154	sap	2
134	OS	56.23	0.05	0.134	sap	2.74
134	OS	57.44	-0.012	0.125	sap	3.95
135	OD	64.88	-0.074	0.161	sap	0
135	OD	66.13	-0.182	0.172	sap	1.24
135	OD	66.82	-0.163	0.152	sap	1.94
135	OD	67.96	-0.118	0.157	sap	3.08
135	OD	68.85	-0.041	0.137	sap	3.98
135	OS	64.88	-0.141	0.166	sap	0
135	OS	66.13	-0.215	0.145	sap	1.24
135	OS	66.82	-0.189	0.209	sap	1.94
135	OS	67.96	-0.124	0.16	sap	3.08
135	OS	68.85	-0.071	0.176	sap	3.98
136	OS	67.41	-0.002	0.134	sap	0
136	OS	68.44	0.017	0.144	sap	1.03
136	OS	69.65	-0.062	0.138	sap	2.24
136	OS	70.54	0.083	0.159	sap	3.12
136	OS	71.54	-0.055	0.2	sap	4.12
137	OD	67.21	-0.023	0.182	sap	0
137	OD	68.01	-0.1	0.173	sap	0.81
137	OD	68.66	-0.169	0.147	sap	1.45
137	OD	69.19	-0.096	0.18	sap	1.98
137	OD	70.16	-0.143	0.17	sap	2.95
137	OD	71.19	-0.132	0.131	sap	3.98
137	OD	72.25	-0.08	0.158	sap	5.04
137	OD	73.44	-0.17	0.128	sap	6.23
137	OS	67.21	-0.271	0.192	sap	0
137	OS	68.01	-0.207	0.218	sap	0.81
137	OS	68.66	-0.19	0.161	sap	1.45
137	OS	69.19	-0.193	0.156	sap	1.98
137	OS	70.16	-0.134	0.152	sap	2.95
137	OS	71.19	-0.178	0.161	sap	3.98
137	OS	72.25	-0.136	0.147	sap	5.04
137	OS	73.44	-0.211	0.156	sap	6.23
138	OD	68.62	0.04	0.154	sap	0
138	OD	69.12	0.109	0.161	sap	0.5
138	OD	69.6	0.001	0.129	sap	0.98
138	OD	70.69	0.07	0.133	sap	2.07
138	OD	71.72	0.153	0.141	sap	3.09
138	OD	72.67	0.017	0.15	sap	4.04
138	OS	68.62	-0.023	0.173	sap	0
138	OS	69.12	0.069	0.135	sap	0.5
138	OS	69.6	-0.146	0.147	sap	0.98
138	OS	70.69	-0.027	0.197	sap	2.07
138	OS	71.72	0.002	0.133	sap	3.09
138	OS	72.67	-0.075	0.174	sap	4.04
139	OD	66.87	0.041	0.138	sap	0
139	OD	67.37	0.121	0.138	sap	0.51
139	OD	67.81	-0.016	0.136	sap	0.94
139	OD	68.94	0.146	0.176	sap	2.07
139	OD	69.95	0.189	0.129	sap	3.08
139	OD	71.01	0.123	0.093	sap	4.13
139	OD	71.98	0.037	0.111	sap	5.11
139	OS	66.87	0.113	0.143	sap	0
139	OS	67.37	0.083	0.124	sap	0.51
139	OS	67.81	-0.158	0.128	sap	0.94
139	OS	68.94	0.203	0.142	sap	2.07
139	OS	69.95	0.187	0.114	sap	3.08
139	OS	71.01	0.16	0.11	sap	4.13
139	OS	71.98	0.098	0.141	sap	5.11
140	OD	57.49	-0.018	0.152	sap	0
140	OD	58.42	-0.119	0.177	sap	0.93
140	OD	59.37	0.022	0.138	sap	1.88
140	OD	60.35	0.019	0.136	sap	2.87
140	OD	61.57	0.041	0.153	sap	4.08
140	OD	62.76	-0.085	0.155	sap	5.26
141	OD	61.24	0.071	0.173	sap	0
141	OD	62.2	0.047	0.195	sap	0.96
141	OD	63.35	0.107	0.193	sap	2.11
141	OD	64.32	0.025	0.196	sap	3.07
141	OD	65.32	0.178	0.215	sap	4.08
141	OD	66.34	0.091	0.188	sap	5.1
141	OD	66.59	0.135	0.154	sap	5.34
141	OD	66.82	0.197	0.222	sap	5.57
141	OD	67.13	0.113	0.338	sap	5.89
142	OS	54.35	0.068	0.156	sap	0
142	OS	55.41	0.002	0.138	sap	1.06
142	OS	56.65	0.045	0.136	sap	2.29
142	OS	57.11	0.076	0.124	sap	2.76
142	OS	58.1	0.085	0.148	sap	3.74
143	OD	57.56	0.122	0.158	sap	0
143	OD	58.17	0.067	0.149	sap	0.62
143	OD	58.58	0.17	0.141	sap	1.02
143	OD	59.61	0.188	0.131	sap	2.05
143	OD	60.59	0.197	0.125	sap	3.04
143	OD	61.83	0.19	0.128	sap	4.26
143	OD	62.25	0.071	0.122	sap	4.7
143	OS	57.56	0.055	0.107	sap	0
143	OS	58.17	0.028	0.13	sap	0.62
143	OS	58.58	0.105	0.122	sap	1.02
143	OS	59.61	0.123	0.136	sap	2.05
143	OS	60.59	0.18	0.121	sap	3.04
143	OS	61.83	0.112	0.115	sap	4.26
143	OS	62.25	-0.007	0.167	sap	4.7
144	OD	59.4	-0.243	0.144	sap	0
144	OD	60.22	-0.318	0.158	sap	0.82
144	OD	60.85	-0.297	0.176	sap	1.46
144	OD	62.05	-0.317	0.183	sap	2.65
144	OD	62.77	-0.103	0.206	sap	3.38
144	OD	63.9	-0.105	0.171	sap	4.51
144	OD	64.22	-0.207	0.226	sap	4.83
145	OD	54.02	-0.049	0.156	sap	0
145	OD	54.59	-0.155	0.157	sap	0.57
145	OD	55.53	-0.122	0.179	sap	1.52
145	OD	56.62	-0.108	0.2	sap	2.6
145	OD	57.62	-0.112	0.16	sap	3.6
145	OS	54.04	-0.145	0.122	sap	0
145	OS	54.59	-0.205	0.174	sap	0.55
145	OS	55.53	-0.233	0.203	sap	1.5
145	OS	56.62	-0.347	0.203	sap	2.58
145	OS	57.62	-0.421	0.164	sap	3.58
146	OD	56.49	-0.041	0.127	sap	0
146	OD	57.07	0.024	0.129	sap	0.59
146	OD	58.04	0.062	0.136	sap	1.56
146	OD	59.16	0.035	0.156	sap	2.68
146	OD	60.33	0.035	0.173	sap	3.84
146	OD	61.12	-0.08	0.17	sap	4.63
146	OS	56.49	-0.124	0.153	sap	0
146	OS	57.07	-0.016	0.129	sap	0.59
146	OS	58.04	0.03	0.127	sap	1.56
146	OS	59.16	-0.05	0.145	sap	2.68
146	OS	60.33	-0.009	0.102	sap	3.84
147	OD	59.67	0.144	0.134	sap	0
147	OD	60.12	0.145	0.099	sap	0.45
147	OD	60.69	0.152	0.112	sap	1.02
147	OD	61.67	0.211	0.127	sap	1.99
147	OD	62.7	0.208	0.117	sap	3.03
147	OD	63.72	0.139	0.113	sap	4.04
147	OD	64.65	0.173	0.122	sap	4.97
147	OS	59.67	0.108	0.11	sap	0
147	OS	60.12	0.094	0.12	sap	0.45
147	OS	60.69	0.14	0.129	sap	1.02
147	OS	61.67	0.161	0.143	sap	1.99
147	OS	62.7	0.174	0.126	sap	3.03
147	OS	63.72	0.067	0.137	sap	4.04
147	OS	64.65	0.097	0.139	sap	4.97
148	OS	68.75	-0.281	0.145	sap	0
148	OS	69.13	-0.081	0.142	sap	0.38
148	OS	70.2	-0.187	0.133	sap	1.45
148	OS	71.18	-0.102	0.149	sap	2.43
148	OS	72.29	-0.092	0.167	sap	3.53
148	OS	73.13	-0.055	0.148	sap	4.38
148	OS	73.7	-0.112	0.175	sap	4.96
149	OD	55.67	0.013	0.109	sap	0
149	OD	56.36	-0.019	0.172	sap	0.69
149	OD	57.13	0.047	0.163	sap	1.47
149	OD	58.26	0.005	0.136	sap	2.6
149	OD	59.53	-0.025	0.165	sap	3.85
149	OS	55.67	-0.03	0.141	sap	0
149	OS	56.36	-0.069	0.135	sap	0.69
149	OS	57.13	-0.032	0.135	sap	1.47
149	OS	58.26	-0.137	0.16	sap	2.6
149	OS	59.53	-0.077	0.139	sap	3.85
150	OS	67.34	-0.032	0.158	sap	0
150	OS	67.96	-0.014	0.169	sap	0.62
150	OS	68.3	0.078	0.123	sap	0.96
150	OS	69.28	0.026	0.162	sap	1.94
150	OS	70.39	0.007	0.155	sap	3.05
150	OS	71.42	0.033	0.137	sap	4.08
150	OS	71.67	-0.111	0.162	sap	4.33
150	OS	72.41	-0.036	0.181	sap	5.07
150	OS	72.65	-0.026	0.161	sap	5.32
151	OD	68.52	0.067	0.124	sap	0
151	OD	69.04	0.099	0.092	sap	0.53
151	OD	69.48	0.115	0.16	sap	0.96
151	OD	70.58	0.087	0.131	sap	2.05
151	OD	71.6	0.131	0.124	sap	3.08
151	OD	72.66	0.077	0.156	sap	4.13
151	OD	73.64	0.089	0.122	sap	5.11
151	OS	68.52	0.118	0.143	sap	0
151	OS	69.04	0.053	0.118	sap	0.53
151	OS	69.48	0.056	0.093	sap	0.96
151	OS	70.58	-0.024	0.128	sap	2.05
151	OS	71.6	0.119	0.115	sap	3.08
151	OS	72.66	-0.014	0.192	sap	4.13
151	OS	73.64	0.116	0.197	sap	5.11
152	OD	55.16	-0.074	0.156	sap	0
152	OD	56.09	-0.143	0.162	sap	0.93
152	OD	57.06	-0.053	0.148	sap	1.9
152	OD	57.99	-0.106	0.189	sap	2.82
152	OD	59.22	-0.009	0.175	sap	4.06
152	OD	60.28	-0.024	0.182	sap	5.11
152	OD	60.6	-0.15	0.191	sap	5.43
152	OD	61.46	-0.151	0.169	sap	6.29
153	OD	51.66	-0.106	0.173	sap	0
153	OD	52.55	-0.067	0.09	sap	0.89
153	OD	53.19	-0.132	0.157	sap	1.54
153	OD	54.07	-0.099	0.135	sap	2.42
153	OD	55.03	-0.021	0.177	sap	3.38
153	OD	55.5	-0.147	0.146	sap	3.84
153	OD	55.86	-0.102	0.163	sap	4.21
154	OS	66.07	-0.121	0.216	sap	0
154	OS	66.82	-0.214	0.19	sap	0.75
154	OS	68.04	-0.233	0.232	sap	1.97
154	OS	68.45	-0.225	0.201	sap	2.38
154	OS	68.77	-0.175	0.192	sap	2.7
154	OS	69.31	-0.117	0.177	sap	3.23
154	OS	69.53	-0.252	0.231	sap	3.46
155	OS	70.55	0.021	0.131	sap	0
155	OS	71.16	0.027	0.172	sap	0.59
155	OS	71.44	-0.065	0.194	sap	0.89
155	OS	72.5	-0.175	0.18	sap	1.95
155	OS	73.33	-0.103	0.168	sap	2.78
1	OD	46.49	0.183266432	0.119017222	fdt	0
1	OD	47.34	0.075283656	0.131495775	fdt	0.85
1	OD	48.41	0.073126815	0.105973002	fdt	1.91
1	OD	49.36	0.123389027	0.139531605	fdt	2.86
1	OD	50.51	0.139564754	0.147652969	fdt	4.01
1	OS	46.49	0.247844963	0.116769743	fdt	0
1	OS	47.34	0.043136857	0.134875014	fdt	0.85
1	OS	48.41	0.025370054	0.108301236	fdt	1.91
1	OS	49.36	0.073088359	0.107411617	fdt	2.86
1	OS	50.51	0.16656446	0.122842097	fdt	4.01
2	OD	52.69	-0.298310295	0.144828613	fdt	0
2	OD	53.52	-0.345833363	0.175073102	fdt	0.83
2	OD	54.67	-0.260727027	0.138216541	fdt	1.98
2	OD	55.61	-0.453031346	0.274025794	fdt	2.92
2	OD	56.64	-0.323458791	0.159720644	fdt	3.95
3	OS	65.9	-0.005332986	0.166508042	fdt	0
3	OS	66.94	-0.14926527	0.150685193	fdt	1.04
3	OS	67.82	-0.028259341	0.155723447	fdt	1.92
3	OS	68.86	0.005645972	0.13674969	fdt	2.96
3	OS	69.91	-0.025497705	0.188336916	fdt	4.01
4	OS	67.39	0.155256756	0.140484832	fdt	0
4	OS	68.33	0.186737592	0.131379622	fdt	0.94
4	OS	69.27	0.037425731	0.119873728	fdt	1.88
4	OS	70.35	-0.056338637	0.151691272	fdt	2.96
4	OS	71.4	-0.01792845	0.150722779	fdt	4.01
5	OD	60.05	0.109496311	0.116067098	fdt	0
5	OD	60.95	0.02717689	0.141270308	fdt	0.9
5	OD	61.88	0.05411592	0.125338705	fdt	1.82
5	OD	62.97	0.076863543	0.124132564	fdt	2.92
5	OD	63.93	0.086746579	0.138262577	fdt	3.87
6	OS	53.3	-0.027191958	0.141303228	fdt	0
6	OS	54.42	-0.115463057	0.142533669	fdt	1.12
6	OS	55.35	-0.018882658	0.172104649	fdt	2.05
6	OS	56.27	0.014341019	0.095954	fdt	2.97
6	OS	57.38	-0.053433614	0.126311415	fdt	4.08
7	OD	43.44	-0.087178149	0.151706408	fdt	0
7	OD	44.33	-0.077440217	0.148658111	fdt	0.89
7	OD	45.39	0.004674002	0.133551363	fdt	1.95
7	OD	46.39	-0.006834866	0.17799997	fdt	2.95
7	OD	47.44	-0.006550394	0.126442425	fdt	4
8	OD	50.43	-0.001356336	0.096432771	fdt	0
8	OD	51.21	-0.152652779	0.143001978	fdt	0.78
8	OD	52.24	-0.046247652	0.100619661	fdt	1.81
8	OD	53.35	-0.052537353	0.111642011	fdt	2.92
8	OD	54.29	-0.101516117	0.1295291	fdt	3.86
9	OS	53.59	0.133153621	0.08949965	fdt	0
9	OS	54.5	0.053153105	0.10686422	fdt	0.91
9	OS	55.38	0.045162908	0.081763574	fdt	1.79
9	OS	56.36	0.037345834	0.105269208	fdt	2.77
9	OS	57.5	0.124660781	0.127115344	fdt	3.91
10	OD	65.31	-0.134786043	0.246644987	fdt	0
10	OD	66.05	-0.097746519	0.199591555	fdt	0.74
10	OD	67.04	-0.170979827	0.221474712	fdt	1.73
10	OD	68.15	-0.163733814	0.264687758	fdt	2.84
10	OD	69.1	-0.172197948	0.288061544	fdt	3.79
10	OS	65.31	-0.033316154	0.134219023	fdt	0
10	OS	66.05	-0.03811215	0.164279603	fdt	0.74
10	OS	67.04	-0.075818025	0.146719028	fdt	1.73
10	OS	68.15	-0.009941934	0.162551708	fdt	2.84
10	OS	69.1	-0.017472534	0.189055905	fdt	3.79
11	OD	45.64	0.230128061	0.136412885	fdt	0
11	OD	46.74	0.226066628	0.11051257	fdt	1.09
11	OD	47.64	0.219709578	0.127389969	fdt	1.99
11	OD	48.66	0.268596666	0.11048378	fdt	3.01
11	OD	49.88	0.333507677	0.098076393	fdt	4.23
11	OS	45.64	0.251135024	0.12313799	fdt	0
11	OS	46.74	0.291811616	0.099101253	fdt	1.09
11	OS	47.64	0.270086599	0.108222343	fdt	1.99
11	OS	48.66	0.259017545	0.119353254	fdt	3.01
11	OS	49.79	0.37236911	0.097573681	fdt	4.14
12	OD	32.84	-0.001157592	0.099031731	fdt	0
12	OD	33.79	-0.064506568	0.130262745	fdt	0.94
12	OD	34.8	-0.145788876	0.116350623	fdt	1.96
12	OD	35.82	-0.036390585	0.126959972	fdt	2.97
12	OD	36.7	-0.05128086	0.139206062	fdt	3.85
12	OS	32.78	0.042564924	0.121931552	fdt	0
12	OS	33.79	0.000764268	0.151043781	fdt	1
12	OS	34.8	-0.088830323	0.141064512	fdt	2.02
12	OS	35.82	0.11359912	0.110980588	fdt	3.03
12	OS	36.7	0.018516248	0.126097559	fdt	3.92
13	OD	51.43	0.000121216	0.088429825	fdt	0
13	OD	52.36	-0.035275002	0.096918528	fdt	0.93
13	OD	53.52	-0.039260081	0.134456132	fdt	2.08
13	OD	54.47	-0.072067625	0.125381945	fdt	3.04
13	OD	55.53	0.061523833	0.107588509	fdt	4.09
13	OS	51.45	-0.019133466	0.119298044	fdt	0
13	OS	52.38	0.025346795	0.130148788	fdt	0.93
13	OS	53.52	-0.126391125	0.158469678	fdt	2.06
13	OS	54.47	-0.120877655	0.193000281	fdt	3.02
13	OS	55.53	-0.036212117	0.166027103	fdt	4.07
14	OD	56.33	-0.048629826	0.13725629	fdt	0
14	OD	57.43	0.023363152	0.134260871	fdt	1.09
14	OD	58.35	0.001512481	0.106031641	fdt	2.02
14	OD	59.53	-0.022855923	0.142590158	fdt	3.2
14	OD	60.29	-0.076101261	0.116887818	fdt	3.96
15	OD	36.01	0.189350846	0.094552138	fdt	0
15	OD	37.08	0.008214871	0.108339121	fdt	1.07
15	OD	37.93	0.048295299	0.113887676	fdt	1.92
15	OD	38.96	0.135069769	0.109498847	fdt	2.95
15	OD	39.96	0.050001975	0.085803696	fdt	3.95
15	OS	36.01	0.131190161	0.118504688	fdt	0
15	OS	37.08	0.031549339	0.113649679	fdt	1.07
15	OS	37.93	-0.02693413	0.118255297	fdt	1.92
15	OS	38.96	0.116014056	0.133479819	fdt	2.95
15	OS	39.96	0.077894725	0.120610453	fdt	3.95
16	OD	49.85	0.174442332	0.123027265	fdt	0
16	OD	50.87	0.213497581	0.116024296	fdt	1.01
16	OD	51.77	0.146825236	0.108202519	fdt	1.92
16	OD	52.77	0.149833552	0.103485099	fdt	2.92
16	OD	53.96	0.149475547	0.10947556	fdt	4.1
16	OS	49.96	0.202561178	0.125830272	fdt	0
16	OS	50.87	0.197229117	0.113069569	fdt	0.9
16	OS	51.77	0.214906584	0.13185522	fdt	1.81
16	OS	52.77	0.236157243	0.128117852	fdt	2.81
16	OS	53.96	0.193433353	0.123668615	fdt	3.99
17	OD	42.43	-0.161116908	0.124790548	fdt	0
17	OD	43.39	-0.134550156	0.186198793	fdt	0.96
17	OD	44.58	-0.120209547	0.11842659	fdt	2.15
17	OD	45.36	-0.18619848	0.142043806	fdt	2.93
17	OD	46.35	-0.176889763	0.208112298	fdt	3.92
18	OD	51.81	-0.184096058	0.136168574	fdt	0
18	OD	52.77	-0.208744647	0.112143791	fdt	0.96
18	OD	53.71	-0.078381877	0.176685598	fdt	1.9
18	OD	54.8	-0.026207179	0.162736512	fdt	2.99
18	OD	55.7	-0.112540403	0.147245393	fdt	3.9
18	OS	51.81	-0.153834484	0.159459977	fdt	0
18	OS	52.77	-0.245197644	0.138999386	fdt	0.96
18	OS	53.71	-0.077915204	0.166756047	fdt	1.9
18	OS	54.8	-0.042362331	0.168797008	fdt	2.99
18	OS	55.7	-0.177449481	0.124883603	fdt	3.9
19	OD	63.31	0.024942598	0.148581015	fdt	0
19	OD	64.3	-0.072278293	0.196608134	fdt	0.99
19	OD	65.15	0.033646177	0.11079179	fdt	1.84
19	OD	66.14	0.063724709	0.13947855	fdt	2.83
19	OD	67.16	0.008640194	0.137675529	fdt	3.85
19	OS	63.31	0.037104709	0.151306276	fdt	0
19	OS	64.3	-0.053185271	0.141899292	fdt	0.99
19	OS	65.15	0.021890167	0.128017976	fdt	1.84
19	OS	66.14	0.027280169	0.129470577	fdt	2.83
19	OS	67.16	0.021047506	0.139649506	fdt	3.85
20	OD	61.35	-0.184204759	0.189357906	fdt	0
20	OD	62.39	-0.244620115	0.185895472	fdt	1.03
20	OD	63.28	-0.216319467	0.162715757	fdt	1.93
20	OD	64.3	-0.182775382	0.13440934	fdt	2.95
20	OD	65.3	-0.241468748	0.199243122	fdt	3.95
20	OS	61.43	-0.109895236	0.108210627	fdt	0
20	OS	62.39	-0.278650951	0.218175882	fdt	0.96
20	OS	63.28	-0.233728857	0.132241349	fdt	1.85
20	OS	64.3	-0.333770461	0.130778849	fdt	2.87
20	OS	65.3	-0.626119466	0.239425117	fdt	3.87
21	OD	66.42	-0.017443926	0.126632218	fdt	0
21	OD	67.36	-0.115046337	0.157239437	fdt	0.94
21	OD	68.28	-0.021690322	0.12313015	fdt	1.85
21	OD	69.3	0.04935706	0.11737879	fdt	2.88
21	OD	70.4	0.030646639	0.157092594	fdt	3.97
21	OS	66.42	-0.033684003	0.127063605	fdt	0
21	OS	67.36	-0.220429075	0.153924985	fdt	0.94
21	OS	68.28	-0.028243757	0.18388846	fdt	1.85
21	OS	69.3	-0.017696858	0.151410512	fdt	2.88
21	OS	70.36	-0.205583629	0.154427759	fdt	3.93
22	OD	66.38	-0.267171218	0.16220373	fdt	0
22	OD	67.28	-0.373864527	0.146421486	fdt	0.9
22	OD	68.18	-0.253337703	0.158927884	fdt	1.8
22	OD	69.24	-0.290367509	0.235400875	fdt	2.86
22	OD	70.21	-0.504093899	0.339963552	fdt	3.83
23	OS	48.47	-0.07277633	0.150134976	fdt	0
23	OS	49.44	0.04584805	0.111094678	fdt	0.97
23	OS	50.35	-0.054890936	0.108077831	fdt	1.88
23	OS	51.36	0.03937314	0.144127378	fdt	2.9
23	OS	52.44	0.084867313	0.119472378	fdt	3.97
24	OD	56.35	-0.164968757	0.144126457	fdt	0
24	OD	57.24	-0.179799497	0.123949683	fdt	0.88
24	OD	58.56	-0.212485873	0.142313493	fdt	2.22
24	OD	59.54	-0.198073541	0.182893483	fdt	3.2
24	OD	60.33	-0.182339482	0.143392563	fdt	3.98
25	OD	66.28	-0.108877463	0.125105148	fdt	0
25	OD	67.1	-0.092893396	0.114243732	fdt	0.8
25	OD	68.1	-0.127233967	0.098428882	fdt	1.8
25	OD	69.08	-0.087425017	0.150036424	fdt	2.79
25	OD	70.12	-0.043784719	0.150711721	fdt	3.82
26	OS	68.1	-0.058159421	0.113537028	fdt	0
26	OS	69.01	-0.137325295	0.136811719	fdt	0.9
26	OS	70.02	-0.132109569	0.120248009	fdt	1.92
26	OS	71.17	-0.147750796	0.114295719	fdt	3.08
26	OS	72.03	-0.080515504	0.118699865	fdt	3.93
27	OS	53.66	0.10098058	0.204914017	fdt	0
27	OS	54.67	0.002650768	0.163403116	fdt	1.01
27	OS	55.69	-0.094976346	0.233255248	fdt	2.02
27	OS	56.59	-0.110685161	0.241264855	fdt	2.93
27	OS	57.68	-0.105196367	0.258955098	fdt	4.02
28	OS	70.64	-0.052502147	0.210735229	fdt	0
28	OS	71.62	-0.083172385	0.186086727	fdt	0.98
28	OS	72.61	-0.039962259	0.163272562	fdt	1.97
28	OS	73.53	-0.068386233	0.142715759	fdt	2.89
28	OS	74.56	-0.036008441	0.166783379	fdt	3.93
29	OD	51.82	0.073159342	0.134848883	fdt	0
29	OD	52.23	-0.031046429	0.160259365	fdt	0.4
29	OD	52.71	-0.010734284	0.12314619	fdt	0.87
29	OD	53.78	0.050850034	0.138227443	fdt	1.95
29	OD	54.86	0.062948735	0.099348153	fdt	3.03
29	OD	55.72	0.125002258	0.147539409	fdt	3.88
29	OS	51.82	-0.011977888	0.139160008	fdt	0
29	OS	52.23	-0.02805591	0.148028442	fdt	0.4
29	OS	52.71	-0.052410707	0.149918592	fdt	0.87
29	OS	53.78	0.051927761	0.178459613	fdt	1.95
29	OS	54.86	0.120422517	0.146005046	fdt	3.03
29	OS	55.72	0.161995653	0.167600959	fdt	3.88
30	OS	64.84	0.13097357	0.131979272	fdt	0
30	OS	65.79	0.193654667	0.109622357	fdt	0.95
30	OS	66.82	0.18095728	0.13811692	fdt	1.98
30	OS	67.82	0.128919872	0.13741201	fdt	2.98
30	OS	68.8	0.015616317	0.14168842	fdt	3.96
31	OS	57.48	0.139296131	0.138231438	fdt	0
31	OS	58.35	-0.067000607	0.157954886	fdt	0.86
31	OS	59.37	0.073089421	0.119787806	fdt	1.89
31	OS	60.38	-0.043379673	0.132451953	fdt	2.9
31	OS	61.35	0.158014105	0.130635741	fdt	3.87
32	OS	47.97	-0.055523037	0.149691935	fdt	0
32	OS	48.89	-0.005492218	0.171598211	fdt	0.92
32	OS	49.93	-0.098942608	0.212798086	fdt	1.95
32	OS	50.9	-0.108972074	0.243350578	fdt	2.93
32	OS	51.94	-0.029547967	0.147297388	fdt	3.97
33	OD	56.09	-0.080627574	0.134173307	fdt	0
33	OD	56.37	-0.075317404	0.11675568	fdt	0.27
33	OD	56.98	-0.121591089	0.153315515	fdt	0.88
33	OD	58.06	-0.159446884	0.135690452	fdt	1.97
33	OD	59.06	-0.109808877	0.175349069	fdt	2.97
34	OD	50.61	0.2170986	0.124247282	fdt	0
34	OD	51.62	0.027341707	0.151974783	fdt	1.01
34	OD	52.71	0.215974941	0.108194685	fdt	2.1
34	OD	53.45	0.096241781	0.128525453	fdt	2.84
34	OD	54.54	0.10343548	0.136775074	fdt	3.92
34	OD	55.61	0.202997142	0.131467355	fdt	5
34	OS	50.61	0.324412873	0.099782848	fdt	0
34	OS	51.62	0.040677579	0.132489545	fdt	1.01
34	OS	52.71	0.169871793	0.11673865	fdt	2.1
34	OS	53.45	0.107846607	0.09972349	fdt	2.84
34	OS	54.54	0.102185622	0.154655959	fdt	3.92
34	OS	55.61	0.236690903	0.116975042	fdt	5
35	OD	51.97	-0.133980313	0.129986981	fdt	0
35	OD	52.88	-0.12531267	0.1305924	fdt	0.9
35	OD	53.92	-0.116800391	0.145046584	fdt	1.93
35	OD	55.01	-0.127085518	0.132620806	fdt	3.04
35	OD	55.91	-0.147419006	0.131830246	fdt	3.93
35	OD	57.02	-0.242670445	0.128791919	fdt	5.04
36	OD	44.98	-0.014291709	0.111615412	fdt	0
36	OD	45.94	0.021694384	0.13037592	fdt	0.96
36	OD	47.13	-0.049652335	0.158893604	fdt	2.15
36	OD	48.01	-0.028777201	0.121974856	fdt	3.02
36	OD	48.9	-0.03748077	0.133812173	fdt	3.92
36	OD	50	0.001946833	0.110378521	fdt	5.02
36	OS	44.98	0.053415328	0.112662245	fdt	0
36	OS	45.94	0.037068446	0.115895962	fdt	0.96
36	OS	47.13	0.047136839	0.142513564	fdt	2.15
36	OS	48.01	0.054795369	0.166980928	fdt	3.02
36	OS	48.9	0.020259517	0.135038381	fdt	3.92
36	OS	50	0.060192696	0.154507965	fdt	5.02
37	OS	52.31	-0.067303783	0.139942603	fdt	0
37	OS	53.46	0.107707015	0.148023169	fdt	1.14
37	OS	54.4	-0.175933635	0.143373864	fdt	2.08
37	OS	55.24	0.016442271	0.126275873	fdt	2.92
37	OS	56.32	0.101716798	0.188666714	fdt	4
37	OS	57.22	0.065848225	0.153876223	fdt	4.9
38	OD	55.93	0.031355717	0.132716838	fdt	0
38	OD	56.95	0.069318287	0.083389265	fdt	1.02
38	OD	57.89	0.045337997	0.126009031	fdt	1.96
38	OD	58.91	0.060080371	0.124399412	fdt	2.98
38	OD	60.02	0.107940031	0.120337293	fdt	4.08
38	OS	55.93	0.053499912	0.132639503	fdt	0
38	OS	56.95	0.110422012	0.105220237	fdt	1.02
38	OS	57.89	0.099049881	0.085206906	fdt	1.96
38	OS	58.91	0.150034877	0.090063121	fdt	2.98
38	OS	60.02	0.155177143	0.103405659	fdt	4.08
39	OD	48.7	-0.301505887	0.113199935	fdt	0
39	OD	49.68	-0.316284991	0.139261396	fdt	0.99
39	OD	50.7	-0.399160457	0.150345809	fdt	2
39	OD	51.68	-0.326354305	0.137836183	fdt	2.98
39	OD	52.65	-0.349269921	0.137498086	fdt	3.96
40	OD	55.56	-0.152269109	0.125775543	fdt	0
40	OD	56.63	-0.232262966	0.13800985	fdt	1.07
40	OD	57.4	-0.139386093	0.097931002	fdt	1.84
40	OD	58.42	-0.153431958	0.107812284	fdt	2.86
40	OD	59.39	-0.152553038	0.140171105	fdt	3.83
40	OS	55.48	-0.228600906	0.167689768	fdt	0
40	OS	56.63	-0.166674043	0.152058164	fdt	1.15
40	OS	57.4	-0.198833612	0.177908293	fdt	1.92
40	OS	58.42	-0.243883956	0.149194445	fdt	2.94
40	OS	59.39	-0.192094315	0.15010145	fdt	3.91
41	OS	61.95	-0.204678817	0.152104413	fdt	0
41	OS	62.81	-0.29722123	0.160060828	fdt	0.86
41	OS	63.81	-0.306065394	0.190236181	fdt	1.86
41	OS	64.79	-0.397162058	0.205296687	fdt	2.84
41	OS	66.03	-0.584858615	0.213151301	fdt	4.08
42	OD	44.73	-0.009708789	0.12899122	fdt	0
42	OD	45.7	0.044449527	0.13047362	fdt	0.97
42	OD	46.73	0.020144381	0.088973979	fdt	2
42	OD	47.75	0.01665662	0.131162077	fdt	3.02
42	OD	48.71	-0.08103855	0.122718282	fdt	3.98
42	OS	44.73	-0.014486637	0.120059829	fdt	0
42	OS	45.7	0.083615909	0.113702074	fdt	0.97
42	OS	46.73	0.049695463	0.115811008	fdt	2
42	OS	47.75	0.00088001	0.121216066	fdt	3.02
42	OS	48.71	-0.056587125	0.126301701	fdt	3.98
43	OD	70.48	-0.131961185	0.142382802	fdt	0
43	OD	71.57	-0.276328286	0.235425495	fdt	1.09
43	OD	72.53	-0.255724245	0.253090674	fdt	2.05
43	OD	73.39	-0.189819056	0.261132735	fdt	2.91
43	OD	74.51	-0.245817538	0.211825492	fdt	4.02
44	OD	55.62	-0.14475241	0.169323538	fdt	0
44	OD	56.59	0.033852971	0.146333765	fdt	0.97
44	OD	57.58	0.013178677	0.164865346	fdt	1.95
44	OD	58.63	0.060799854	0.138742086	fdt	3.01
44	OD	59.5	-0.067118548	0.224074215	fdt	3.88
45	OD	57.01	-0.035800332	0.118805207	fdt	0
45	OD	57.93	0.007527923	0.107170501	fdt	0.92
45	OD	58.91	-0.050336068	0.123535682	fdt	1.9
45	OD	60.02	-0.010269469	0.11764991	fdt	3.01
45	OD	60.95	-0.124071025	0.132088221	fdt	3.94
45	OS	57.01	-0.018407598	0.146125649	fdt	0
45	OS	57.93	-0.028679222	0.165001792	fdt	0.92
45	OS	58.91	-0.082257236	0.166644007	fdt	1.9
45	OS	60.02	0.006037335	0.169144681	fdt	3.01
45	OS	60.95	-0.002635165	0.167619213	fdt	3.94
46	OS	61.58	-0.033673716	0.165497311	fdt	0
46	OS	62.7	0.111260161	0.12585521	fdt	1.12
46	OS	63.75	0.12625465	0.137061652	fdt	2.16
46	OS	64.61	0.032436445	0.165203795	fdt	3.03
46	OS	65.79	0.103321624	0.124056573	fdt	4.21
47	OD	62.3	-0.066570033	0.154747645	fdt	0
47	OD	63.22	-0.237150449	0.218965319	fdt	0.92
47	OD	64.18	-0.126860761	0.152845018	fdt	1.88
47	OD	65.16	-0.160281404	0.172136123	fdt	2.86
47	OD	66.12	-0.13580527	0.169591618	fdt	3.82
47	OS	62.3	-0.171293115	0.125808459	fdt	0
47	OS	63.22	-0.259244788	0.275967862	fdt	0.92
47	OS	64.18	-0.131855925	0.139075639	fdt	1.88
47	OS	65.16	-0.103524975	0.180319021	fdt	2.86
47	OS	66.12	-0.156317705	0.181007538	fdt	3.82
48	OS	66.16	-0.357617415	0.130824798	fdt	0
48	OS	67.24	-0.294094766	0.117155548	fdt	1.07
48	OS	67.6	-0.303527302	0.115542271	fdt	1.44
48	OS	68.07	-0.298524643	0.147467676	fdt	1.91
48	OS	69.1	-0.350719794	0.132230785	fdt	2.94
48	OS	70.15	-0.307709566	0.128601286	fdt	3.99
49	OD	59.44	-0.309051579	0.150706957	fdt	0
49	OD	60.34	-0.28226406	0.159138363	fdt	0.9
49	OD	61.24	-0.449153824	0.210671333	fdt	1.8
49	OD	62.37	-0.370240506	0.181161763	fdt	2.93
49	OD	63.32	-0.410319674	0.189249089	fdt	3.88
49	OS	59.44	-0.053834048	0.161047362	fdt	0
49	OS	60.34	-0.081251377	0.130017585	fdt	0.9
49	OS	61.24	-0.293091784	0.167534173	fdt	1.8
49	OS	62.37	-0.258355637	0.183835093	fdt	2.93
49	OS	63.32	-0.183427062	0.144354461	fdt	3.88
50	OD	51.96	0.225360738	0.128098056	fdt	0
50	OD	52.91	0.085231587	0.140967933	fdt	0.95
50	OD	53.9	0.095323529	0.1023711	fdt	1.94
50	OD	54.92	0.215500563	0.135740559	fdt	2.95
50	OD	55.94	0.229682445	0.130708172	fdt	3.97
50	OS	51.96	0.139003246	0.133744657	fdt	0
50	OS	52.91	0.048553191	0.171185971	fdt	0.95
50	OS	53.9	0.070013877	0.110689055	fdt	1.94
50	OS	54.92	0.264784957	0.12690535	fdt	2.95
50	OS	55.94	0.192573503	0.101432986	fdt	3.97
51	OD	60.57	-0.179822911	0.152589568	fdt	0
51	OD	61.6	-0.231067227	0.131143971	fdt	1.03
51	OD	62.58	-0.195241365	0.145152585	fdt	2.01
51	OD	63.56	-0.298643583	0.138860317	fdt	2.99
51	OD	64.71	-0.139397308	0.155394202	fdt	4.14
52	OS	46.03	0.159236461	0.141368144	fdt	0
52	OS	47.38	-0.000628907	0.142408318	fdt	1.35
52	OS	48.06	0.076815092	0.141895021	fdt	2.02
52	OS	48.95	0.122549764	0.140673989	fdt	2.92
52	OS	50.07	0.058795746	0.238774057	fdt	4.04
53	OS	60.92	0.081472021	0.137791428	fdt	0
53	OS	61.93	0.081242625	0.144236814	fdt	1.01
53	OS	62.79	-0.018576454	0.157618526	fdt	1.87
53	OS	63.89	0.08451795	0.157161192	fdt	2.97
53	OS	64.88	0.103142301	0.165564688	fdt	3.96
54	OD	53.3	0.051927203	0.113234791	fdt	0
54	OD	54.28	0.024306989	0.107623926	fdt	0.98
54	OD	55.16	0.048163394	0.092752427	fdt	1.86
54	OD	56.12	0.000804625	0.156022519	fdt	2.82
54	OD	57.38	0.104519002	0.130199523	fdt	4.1
55	OD	54.93	-0.136850002	0.111912244	fdt	0
55	OD	55.95	0.023716771	0.128425898	fdt	1.01
55	OD	56.91	-0.076543648	0.114745382	fdt	1.97
55	OD	57.96	-0.118081413	0.104080269	fdt	3.03
55	OD	58.98	0.003442667	0.115834349	fdt	4.04
55	OS	54.93	-0.090425047	0.112603305	fdt	0
55	OS	55.95	0.051299167	0.093664485	fdt	1.01
55	OS	56.91	-0.040990937	0.133535361	fdt	1.97
55	OS	57.96	-0.038786787	0.119147303	fdt	3.03
55	OS	58.98	0.038951804	0.142593824	fdt	4.04
56	OS	69.12	0.07096003	0.159513477	fdt	0
56	OS	70.33	0.029942395	0.169701956	fdt	1.21
56	OS	70.96	0.02926302	0.221189183	fdt	1.85
56	OS	72.13	0.05026171	0.188776641	fdt	3.01
56	OS	73	0.090475815	0.284856627	fdt	3.88
57	OS	54.51	0.034248373	0.113998136	fdt	0
57	OS	55.56	0.051353289	0.124540363	fdt	1.05
57	OS	56.41	0.090686356	0.10975906	fdt	1.9
57	OS	57.44	-0.116188758	0.161843524	fdt	2.93
57	OS	58.49	0.027154665	0.124039289	fdt	3.98
58	OD	60.24	-0.066450864	0.139480814	fdt	0
58	OD	61.29	-0.052598991	0.115867398	fdt	1.05
58	OD	62.12	-0.003635505	0.117976855	fdt	1.87
58	OD	63.29	-0.037478275	0.12774004	fdt	3.05
58	OD	64.21	-0.016281825	0.130793532	fdt	3.96
58	OS	60.22	-0.08443609	0.134970875	fdt	0
58	OS	61.29	-0.059214152	0.151557437	fdt	1.07
58	OS	62.12	-0.013728489	0.134412906	fdt	1.89
58	OS	63.29	-0.042745146	0.174455017	fdt	3.07
58	OS	64.21	-0.062931664	0.139267997	fdt	3.98
59	OD	66.05	-0.220801654	0.147863069	fdt	0
59	OD	67.02	-0.192878898	0.149544228	fdt	0.97
59	OD	67.96	-0.23857217	0.186245386	fdt	1.91
59	OD	69.05	-0.33089947	0.186578766	fdt	3
59	OD	70.05	-0.29013776	0.167759833	fdt	4
60	OD	66.83	0.022535508	0.106528891	fdt	0
60	OD	67.42	-0.015932558	0.119293147	fdt	0.59
60	OD	67.81	-0.09830225	0.112919828	fdt	0.98
60	OD	68.74	-0.142302305	0.108231378	fdt	1.91
60	OD	69.38	-0.119839245	0.137767244	fdt	2.56
60	OS	66.83	0.025869667	0.116644941	fdt	0
60	OS	67.42	-0.013347294	0.102343926	fdt	0.59
60	OS	67.81	-0.142330549	0.135463307	fdt	0.98
60	OS	68.74	-0.136767363	0.114109352	fdt	1.91
60	OS	69.38	-0.122214803	0.118170223	fdt	2.56
61	OD	61.69	-0.056384271	0.145069907	fdt	0
61	OD	62.44	-0.077531215	0.148223509	fdt	0.76
61	OD	63.57	-0.070502569	0.160938669	fdt	1.88
61	OD	64.54	-0.069841159	0.171196641	fdt	2.85
61	OD	64.85	-0.026571812	0.138381178	fdt	3.18
61	OD	65.81	-0.039828456	0.159092888	fdt	4.13
61	OD	66.52	-0.015220311	0.132066361	fdt	4.83
62	OD	54.87	-0.261958992	0.229248463	fdt	0
62	OD	55.96	-0.054807061	0.112749201	fdt	1.09
62	OD	56.64	-0.202326997	0.212364767	fdt	1.78
62	OD	57.8	-0.041486356	0.125619851	fdt	2.93
62	OD	58.22	0.077080444	0.139898687	fdt	3.35
62	OD	58.73	-0.121424863	0.132158808	fdt	3.86
62	OD	59.75	-0.040275578	0.173182821	fdt	4.88
62	OD	60.75	-0.259912635	0.138851513	fdt	5.88
62	OD	61.67	0.139963252	0.145824691	fdt	6.79
62	OD	62.81	0.061868669	0.155636442	fdt	7.94
62	OD	63.25	0.130858909	0.127206741	fdt	8.37
62	OS	58.73	-0.262333831	0.225350384	fdt	0
62	OS	59.75	-0.045648697	0.172069276	fdt	1.01
62	OS	60.75	-0.162210048	0.179689044	fdt	2.01
62	OS	61.67	-0.022273371	0.145198532	fdt	2.93
62	OS	62.81	-0.152285416	0.157482073	fdt	4.08
63	OD	63.69	0.14513053	0.147771305	fdt	0
63	OD	64.72	0.120256289	0.189116181	fdt	1.02
63	OD	65.44	0.152944532	0.158751877	fdt	1.75
63	OD	65.84	0.253717332	0.123615337	fdt	2.16
63	OD	66.92	0.018761007	0.123848534	fdt	3.23
63	OD	68.22	0.045076324	0.149284862	fdt	4.53
63	OD	69.23	0.082653412	0.154894268	fdt	5.55
64	OS	56.32	-0.239375383	0.112336577	fdt	0
64	OS	57.31	-0.430585238	0.195191614	fdt	0.99
64	OS	58.26	-0.32159035	0.145205865	fdt	1.93
64	OS	59.11	-0.459371052	0.205527339	fdt	2.79
64	OS	59.99	-0.455522298	0.217618503	fdt	3.67
64	OS	61.07	-0.214345545	0.146597635	fdt	4.75
64	OS	61.74	-0.292544126	0.141323921	fdt	5.42
64	OS	62.25	-0.23512957	0.11750759	fdt	5.92
64	OS	63.19	-0.393977604	0.172081496	fdt	6.86
64	OS	64.24	-0.250416277	0.14608371	fdt	7.92
65	OS	67.46	0.198542711	0.124217049	fdt	0
65	OS	68.68	0.211598823	0.10099831	fdt	1.21
65	OS	69.42	0.273045514	0.113183711	fdt	1.95
65	OS	70.51	0.207491376	0.100263266	fdt	3.04
65	OS	71.35	0.234819729	0.102428194	fdt	3.89
65	OS	72.1	0.296491423	0.110106904	fdt	4.64
65	OS	73.31	0.184965875	0.096474865	fdt	5.84
66	OS	51.07	-0.238424368	0.12651621	fdt	0
66	OS	51.56	-0.152811566	0.150055018	fdt	0.48
66	OS	52.51	-0.111515128	0.170668743	fdt	1.43
66	OS	53.19	-0.164617613	0.133885606	fdt	2.11
66	OS	54.12	-0.146901271	0.129274059	fdt	3.05
67	OD	58.5	-0.243380368	0.169374928	fdt	0
67	OD	59.49	-0.179156807	0.112447153	fdt	0.99
67	OD	60.64	-0.134966429	0.177207176	fdt	2.14
67	OD	61.51	-0.172951939	0.13947637	fdt	3.01
67	OD	62.79	-0.128259564	0.121152161	fdt	4.29
67	OD	63.33	-0.165926895	0.134452399	fdt	4.84
67	OD	64.2	-0.180781595	0.135412099	fdt	5.7
68	OD	66.04	-0.048866347	0.158207521	fdt	0
68	OD	66.59	0.003641572	0.157048988	fdt	0.55
68	OD	67.24	-0.042319064	0.155123757	fdt	1.19
68	OD	68.18	-0.034622623	0.131761158	fdt	2.13
68	OD	69.32	-0.057396891	0.145177437	fdt	3.27
68	OD	69.95	-0.151185369	0.165891947	fdt	3.91
68	OD	70.19	-0.036508633	0.154845922	fdt	4.15
68	OD	70.68	-0.068872907	0.146982244	fdt	4.64
68	OD	71.33	-0.02489177	0.164823257	fdt	5.28
68	OS	66.04	-0.018578057	0.149175449	fdt	0
68	OS	66.59	-0.346414617	0.286888729	fdt	0.55
68	OS	67.24	-0.014581583	0.139698973	fdt	1.19
68	OS	68.18	0.027894895	0.151333535	fdt	2.13
68	OS	69.32	-0.070911765	0.145031856	fdt	3.27
68	OS	69.95	-0.07441623	0.149522316	fdt	3.91
68	OS	70.19	-0.045392898	0.143475358	fdt	4.15
68	OS	71.33	-0.048640618	0.164462439	fdt	5.28
69	OD	65.18	-0.070665081	0.152200949	fdt	0
69	OD	66.06	-0.063298412	0.141980575	fdt	0.88
69	OD	66.8	-0.050102761	0.126659993	fdt	1.62
69	OD	67.84	-0.120178552	0.178147136	fdt	2.67
69	OD	68.79	-0.051334305	0.135752031	fdt	3.62
70	OD	60.3	0.122081832	0.133471409	fdt	0
70	OD	61.27	0.027990506	0.133996338	fdt	0.97
70	OD	62	-0.081761398	0.205540919	fdt	1.71
70	OD	63.32	0.110132496	0.158017313	fdt	3.01
70	OD	64.35	-0.06753304	0.268480976	fdt	4.04
70	OD	65.34	0.060142372	0.116814543	fdt	5.04
70	OD	66.56	0.099016207	0.152188831	fdt	6.25
70	OD	67.85	0.145174024	0.160244319	fdt	7.55
70	OD	69.16	0.022062606	0.140000269	fdt	8.85
70	OS	60.3	0.124276173	0.128089517	fdt	0
70	OS	61.27	0.030253765	0.118251609	fdt	0.97
70	OS	62	-0.101007734	0.194517949	fdt	1.71
70	OS	63.32	0.079003512	0.114920319	fdt	3.01
70	OS	64.35	0.09731112	0.118416565	fdt	4.04
70	OS	65.34	0.026545787	0.118410766	fdt	5.04
70	OS	66.56	0.102106014	0.13778915	fdt	6.25
70	OS	67.85	0.081733541	0.098915965	fdt	7.55
70	OS	69.16	0.034722132	0.158105496	fdt	8.85
71	OD	65.91	0.03185941	0.130455459	fdt	0
71	OD	66.95	-0.025978153	0.19096986	fdt	1.05
71	OD	67.99	0.008317204	0.165061106	fdt	2.08
71	OD	68.66	0.036709999	0.156212046	fdt	2.75
71	OD	69.88	0.082692834	0.143469557	fdt	3.97
71	OD	70.64	0.033178229	0.204784201	fdt	4.73
72	OD	64.44	-0.16724223	0.158245927	fdt	0
72	OD	65.47	-0.25627062	0.141328277	fdt	1.03
[truncated: 927 more rows]
